# Supplementary material for: Cobalt nanoparticles embedded in a nitrogen-doped carbon matrix for reductive amination of biomass-derived furfural to furfurylamine
Source: Royal Society of Chemistry journal article supplement (doi:10.1039/d2se00408a), 2022-01-01
Supplement: d2se00408a1.pdf [file d2se00408a1.pdf]

## Supporting information

### **Cobalt nanoparticles embedded in a nitrogen-doped carbon catalyst for reductive amination of biomass-derived furfural to furfurylamine**

Yogita <sup>a, b</sup>, K. T. Venkateshwara Rao <sup>a</sup> P. Mahesh Kumar <sup>a, b</sup> and N. Lingaiah <sup>a, b\*</sup>

<sup>a</sup>Department of Catalysis and Fine Chemicals, CSIR-Indian Institute of Chemical Technology,  
Hyderabad–500007, India.

<sup>b</sup>Academy of Scientific and Innovative Research (AcSIR), Ghaziabad–201002, India.

\*Corresponding author Email: [nakkalingaiah@iict.res.in](mailto:nakkalingaiah@iict.res.in)

### **Synthesis of 20wt.%Co/AC Catalyst**

In a typical procedure, the required quantity of  $\text{Co}(\text{NO}_3)_2 \cdot 4\text{H}_2\text{O}$  was dissolved in distilled water, followed by the addition of activated carbon (AC) support. The resulting mixture was stirred at room temperature for a few hours, followed by the removal of excess water on a hot plate. The obtained solid mass was dried at 100 °C in an oven for 10 h. The 20wt.%Co/AC catalyst was obtained, first calcined at 500 °C for 4 h under  $\text{N}_2$  followed by the reduction in an  $\text{H}_2$  flow (20 mL/min) at 500 °C for 3h.

### **Synthesis of phosphated activated carbon (20P-AC) catalyst**

The preparation of 20P-AC catalyst involves a two-step process. Initially, 10 g of AC was dispersed in 250 mL of water, followed by the addition of 40 mL  $\text{H}_2\text{O}_2$ . The resulting mixture was stirred at 40 °C for overnight. The oxidized AC was obtained by filtration, followed by drying at 100 °C overnight. In a second step, the required quantity of oxidized AC was dispersed in 50 mL of water, followed by the dropwise addition of a specific amount of  $\text{H}_3\text{PO}_4$ . The resulting mixture was stirred at room temperature for 3 h, followed by the evaporation of excess water by rotavapor under a vacuum. The obtained solid mass was calcined at 300 °C for 3 h under  $\text{N}_2$  flow (30 mL/min).

### **Reaction procedure for dehydration of xylose to furfural**

In a typical synthesis, 0.6 g of xylose, 2g of NaCl, 12 mL of water, THF (48 mL), 0.6 g of 20P-AC catalyst were charged into a 100 mL Parr autoclave reactor. The autoclave was flushed three times with  $\text{N}_2$  and pressurized 1MPa  $\text{N}_2$ . The reaction mixture was vigorously stirred at 160 °C for 3 h. After completion of the reaction, the reactor was quenched to room temperature, followed by the separation of the catalyst by centrifugation. Both aqueous and organic phases of liquid samples are analyzed separately by HPLC (SHIMADZU) analysis equipped with a refractive index (RI)

and UV detectors using a Shodex SC1011 sugar column. A binary mixture of HPLC grade water and acetonitrile (30:70 v/v) is used as a mobile phase (0.8 mL/min). The products were identified and quantified using known standards through an external calibration method.

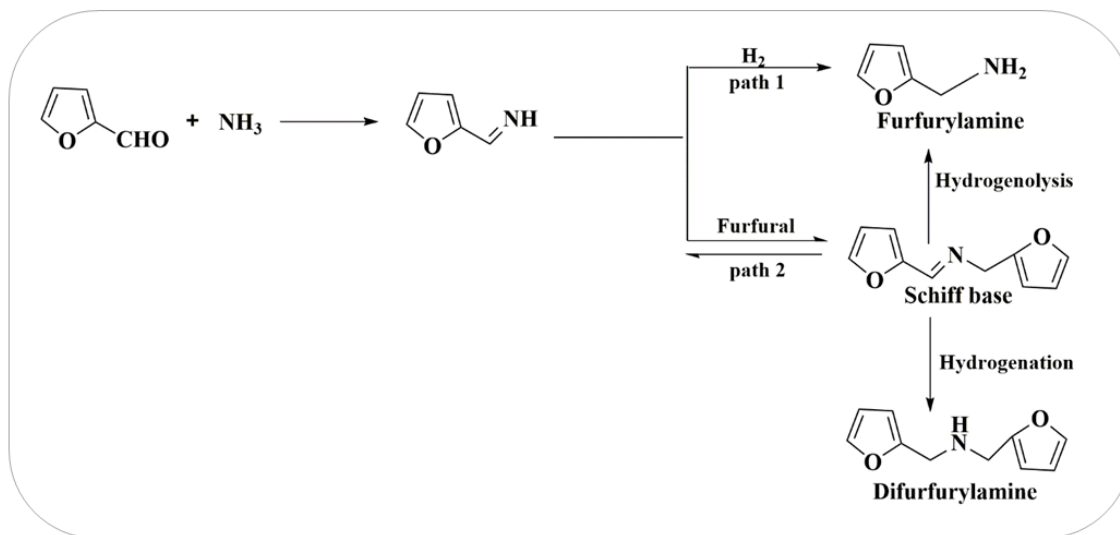

Scheme S1. Reaction pathway for the reductive amination of furfural.

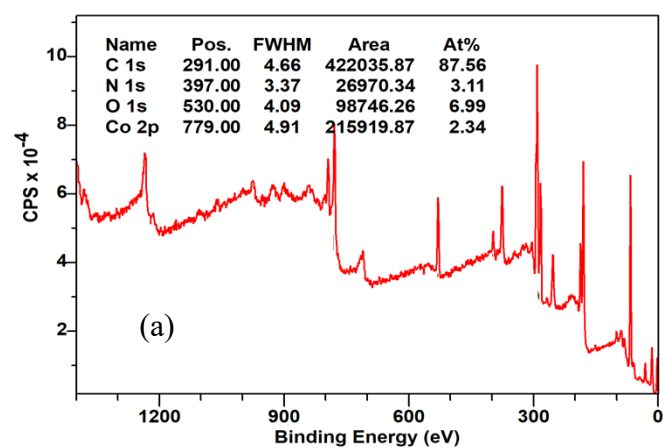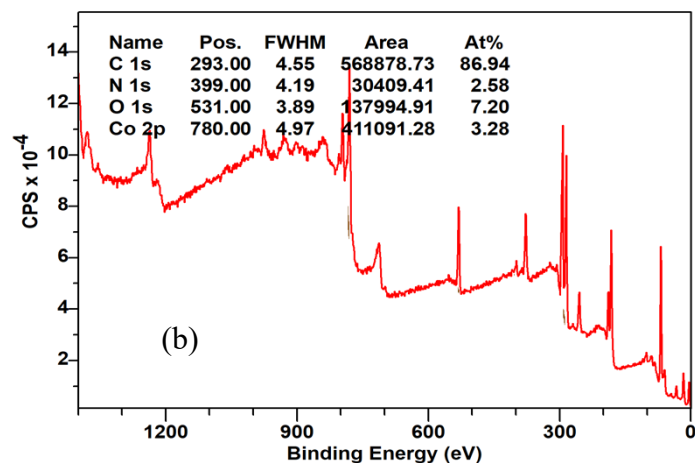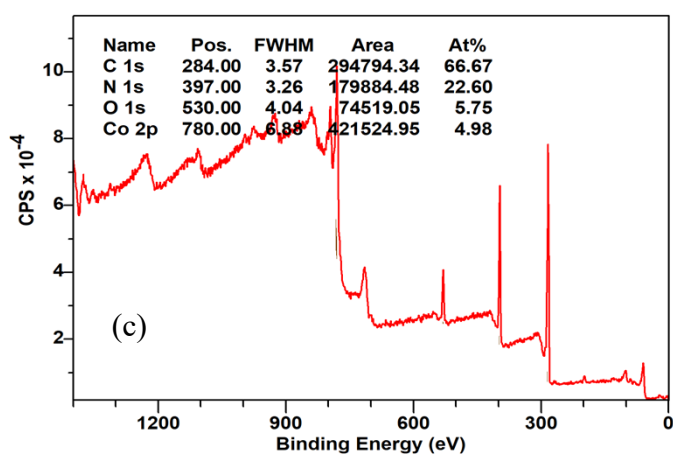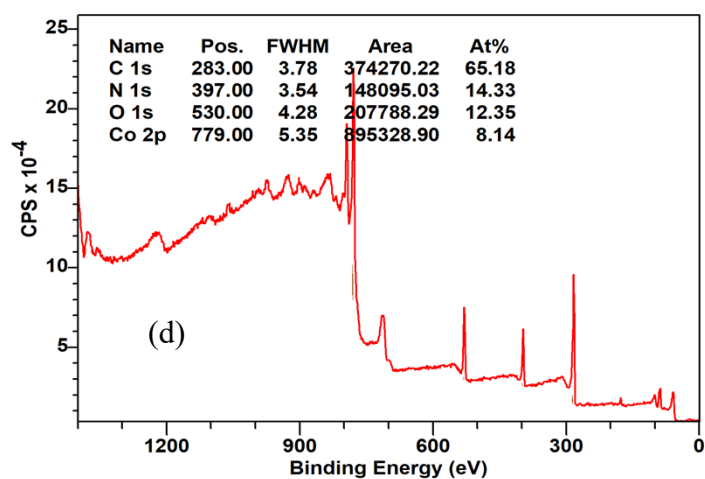

Figure S2. XPS survey scan spectra of (a) Co/NC-700, (b) Co/NC-600, (c) Co/NC-500, and (d) Co/NC-400 catalysts.

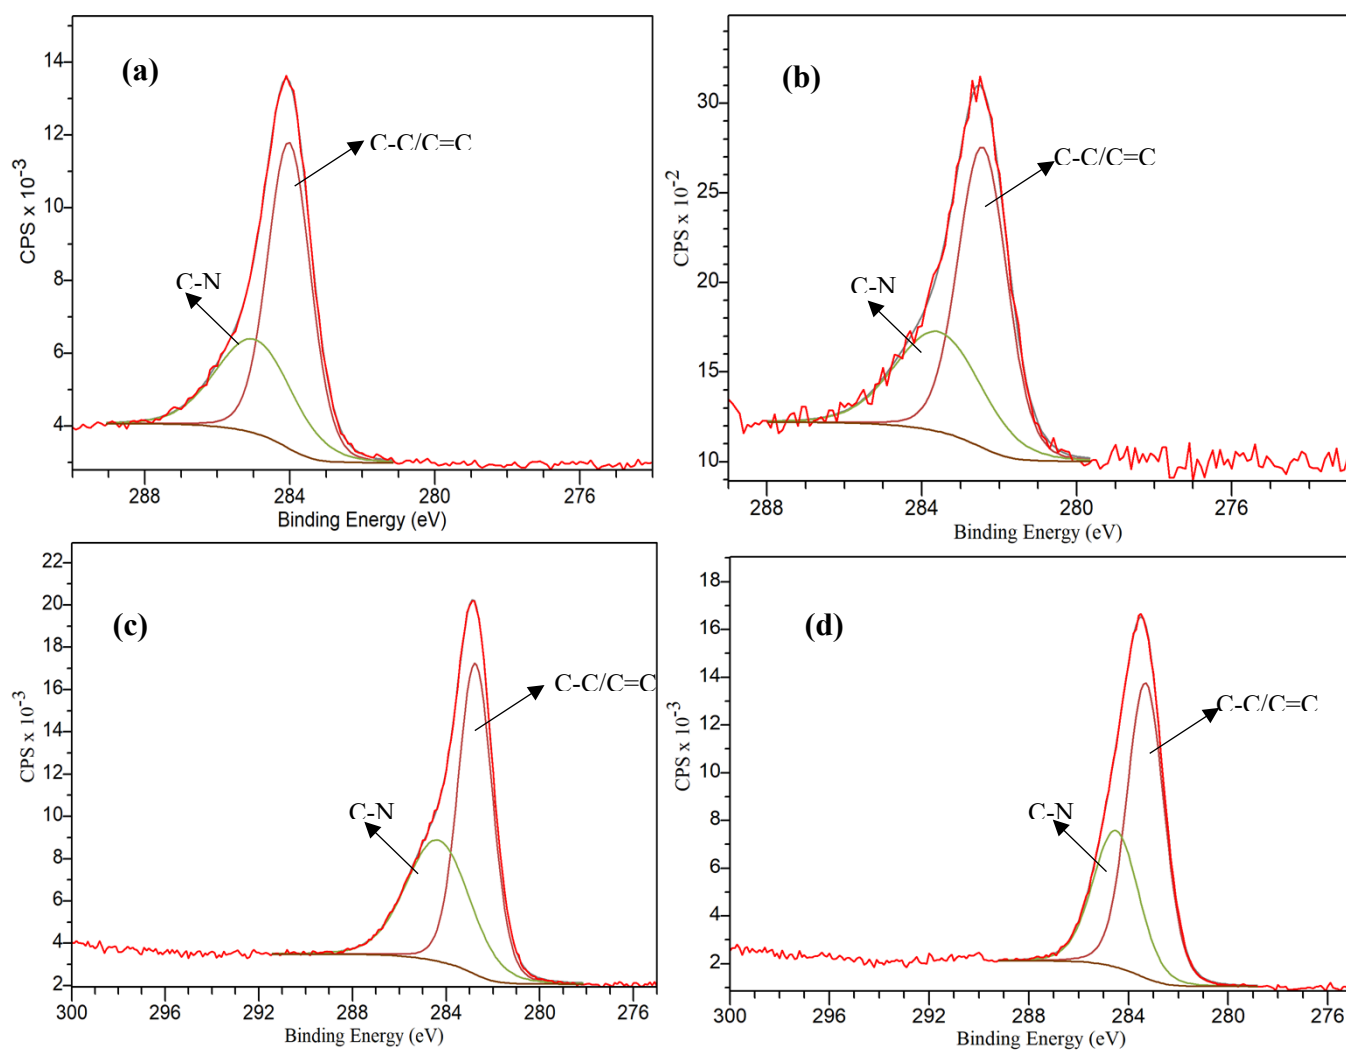

Figure S3: The C 1s XPS spectra of (a) Co/NC-700, (b) Co/NC-600, (c) Co/NC-500, and (d) Co/NC-400 catalysts.

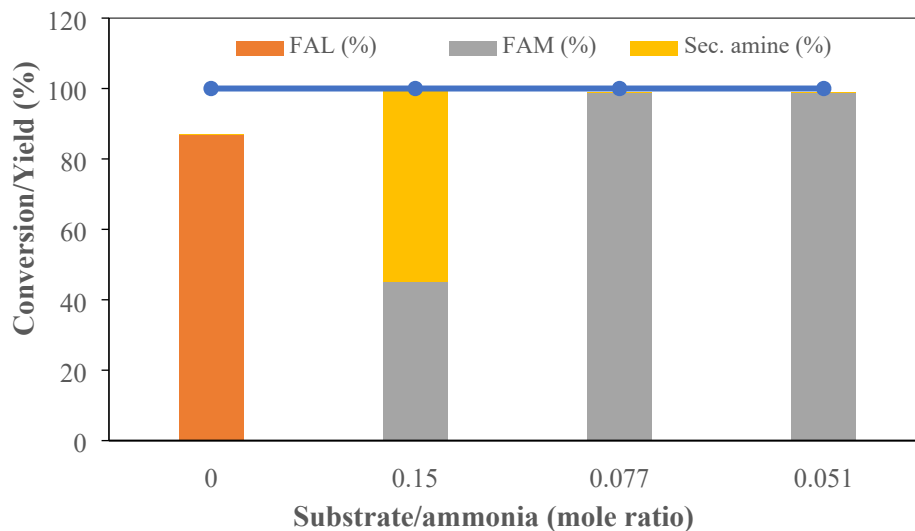

Fig. S4. Effect of substrate/ammonia (mole ratio) for reductive amination of furfural.

Reaction conditions: FA (0.096 g), catalyst (50 mg), methanol (12 mL), H<sub>2</sub> pressure (2 MPa) reaction temperature (120 °C), reaction time (1 h).

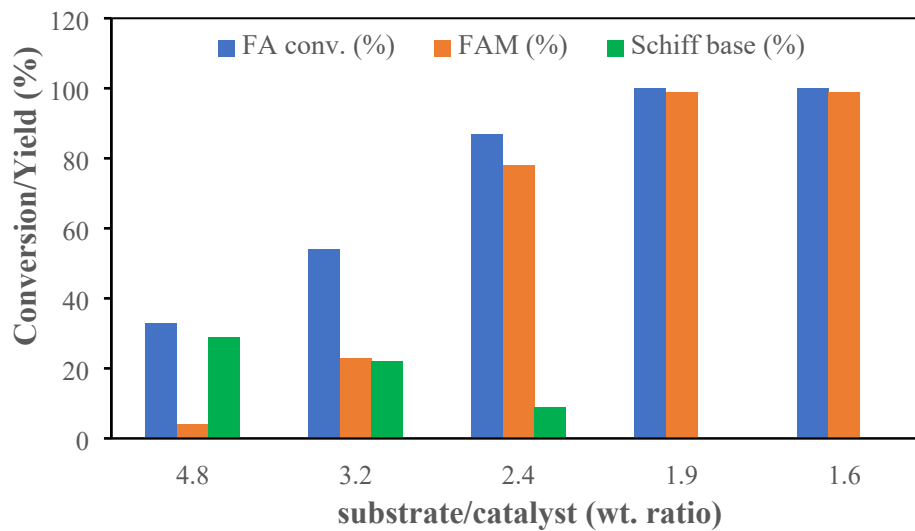

Fig. S5. Effect of substrate/catalyst (wt. ratio) for the reductive amination of furfural.

Reaction conditions: FA (0.096 g), Aq. NH<sub>3</sub> (1 mL), methanol (12 mL), H<sub>2</sub> pressure (2 MPa) reaction temperature (120 °C), reaction time (1 h).

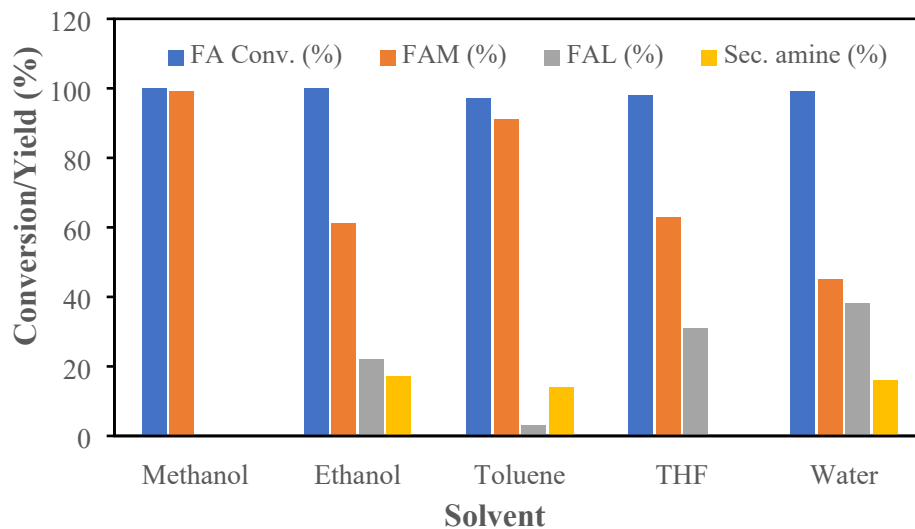

Fig. S6. Effect of solvent for reductive amination of furfural.

Reaction conditions: FA (0.096 g), catalyst (50 mg), Aq.  $\text{NH}_3$  (1 mL), methanol (12 mL),  $\text{H}_2$  pressure (2 MPa), reaction temperature (120 °C), reaction time (1 h).

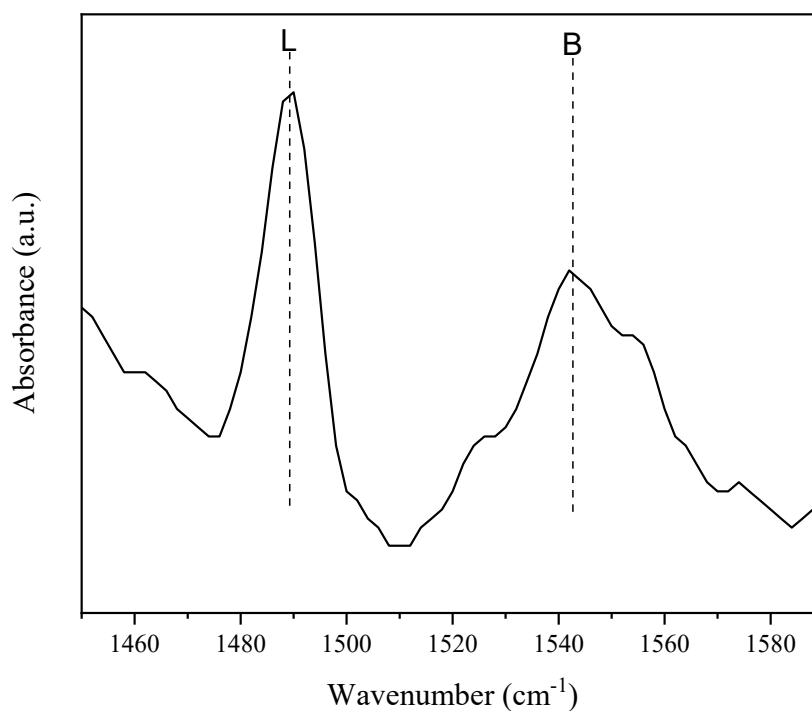

Fig. S7. Pyridine FT-IR spectra of a 20P-AC catalyst.

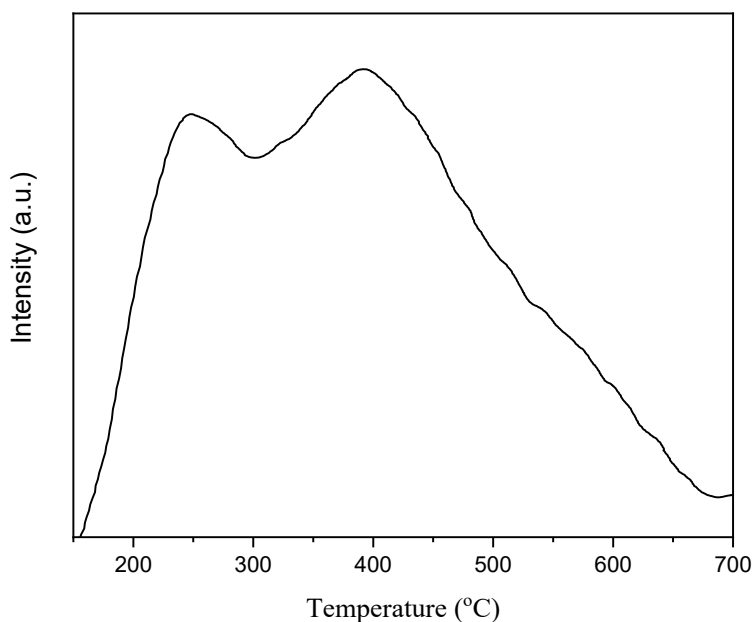

Fig. S8.  $\text{NH}_3$  -TPD spectra of a 20P-AC catalyst.

### NMR And GC-MS spectra of synthesized molecules

#### Entry 1: Furfurylamine

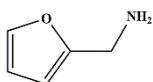

$^1\text{H}$  NMR (400 MHz  $\text{CDCl}_3$ )  $\delta$  (ppm): 7.33 (s, 1H), 6.29 (s, 1H), 6.12 (s, 1H), 3.80 (s, 2H), 1.61 (s, 2H)

$^{13}\text{C}$  NMR (100 MHz  $\text{CDCl}_3$ )  $\delta$  (ppm): 156.54, 141.51, 104.97, 101.14, 39.27

GCMS  $m/z$  (%): 97 (93.6), 96 (45.7), 69 (100), 53 (37), 41 (35.8).

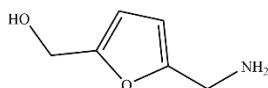

#### Entry 2: (5-(aminomethyl)furan-2-yl)methanol

$^1\text{H}$  NMR (400 MHz  $\text{CDCl}_3$ )  $\delta$  (ppm): 6.17 (d, 1H), 6.06 (d, 1H), 4.53 (s, 2H), 3.77 (s, 2H).

$^{13}\text{C}$  NMR (100 MHz  $\text{CDCl}_3$ )  $\delta$  (ppm): 155.05, 152.75, 107.44, 105.19, 56.40, 30.25.

GCMS  $m/z$  (%): 127 (24.8), 96 (100), 68 (13.3), 41 (13.7), 30 (11.4).

Entry 3: **phenylmethanamine**

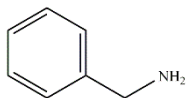

$^1\text{H}$  NMR (400 MHz  $\text{CDCl}_3$ )  $\delta$  (ppm): 7.30- 7.18 (m, 5H), 3.76 (s, 2H), 1.53 (s, 2H).

$^{13}\text{C}$  NMR (100 MHz  $\text{CDCl}_3$ )  $\delta$  (ppm): 143.41, 127.10, 126.79, 46.55.

GCMS  $m/z$  (%): 107 (100), 106 (100), 79 (86.8), 78 (33.7), 77 (57.4)

Entry 4: **(4-methylphenyl)methanamine**

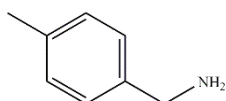

$^1\text{H}$  NMR (400 MHz  $\text{CDCl}_3$ )  $\delta$  (ppm): 7.18 (d, 1H), 7.14 (d, 1H), 3.78 (s, 2H), 2.34 (s, 3H), 1.96 (s, 2H).

$^{13}\text{C}$  NMR (100 MHz  $\text{CDCl}_3$ )  $\delta$  (ppm): 140.51, 136.32, 129.35, 127.11, 46.28, 21.09.

GCMS  $m/z$  (%): 120 (95), 106 (80), 104 (100), 93 (61), 91 (66).

Entry 5: **(4-fluorophenyl)methanamine**

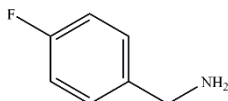

$^1\text{H}$  NMR (400 MHz  $\text{CDCl}_3$ )  $\delta$  (ppm): 7.32-7.28 (q, 2H), 7.05-7.00 (t, 2H), 3.88 (s, 2H).

$^{13}\text{C}$  NMR (100 MHz  $\text{CDCl}_3$ )  $\delta$  (ppm): 163.20, 160.53, 136.71, 135.98, 128.99, 128.91, 115.48, 115.23, 45.03.

GCMS  $m/z$  (%): 125 (37), 124 (100), 109 (26.4), 105 (49.3), 97 (38).

Entry 6: **(2-chlorophenyl)methanamine**

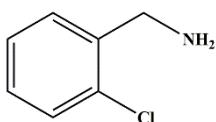

GCMS  $m/z$  : 142, 106, 79, 77, 51, 31

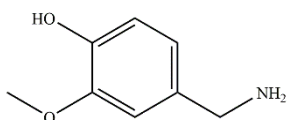

Entry 7: **4-(aminomethyl)-2-methoxyphenol**

GCMS  $m/z$  (%): 153 (41.4), 152 (46.1), 137 (100), 122 (50), 32 (81).

Entry 8: **Cyclohexylamine**

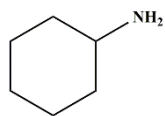

$^1\text{H}$  NMR (400 MHz  $\text{CDCl}_3$ )  $\delta$  (ppm): 2.65-2.58 (m, 1H), 1.83-1.58 (m, 5H), 1.31-1.00 (m, 7H).

$^{13}\text{C}$  NMR (100 MHz  $\text{CDCl}_3$ )  $\delta$  (ppm): 50.28, 36.66, 25.77, 25.04.

GCMS  $m/z$  (%): 99 (16), 70 (19.5), 56 (100), 43 (22.6), 42 (6.6).

Entry 9: **(4-chlorophenyl)ethan-1-amine**

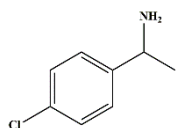

$^1\text{H}$  NMR (400 MHz  $\text{CDCl}_3$ )  $\delta$  (ppm): 7.31 (s, 4H), 4.91-4.86 (q, 1H), 2.0 (s, 2H), 1.48-1.47 (d, 3H)

GCMS  $m/z$  (%): 142 (32), 141 (8), 140 (100), 113 (9), 77 (19.7).

**$^1\text{H}$  NMR,  $^{13}\text{C}$  NMR and GC-MS of synthesized products**

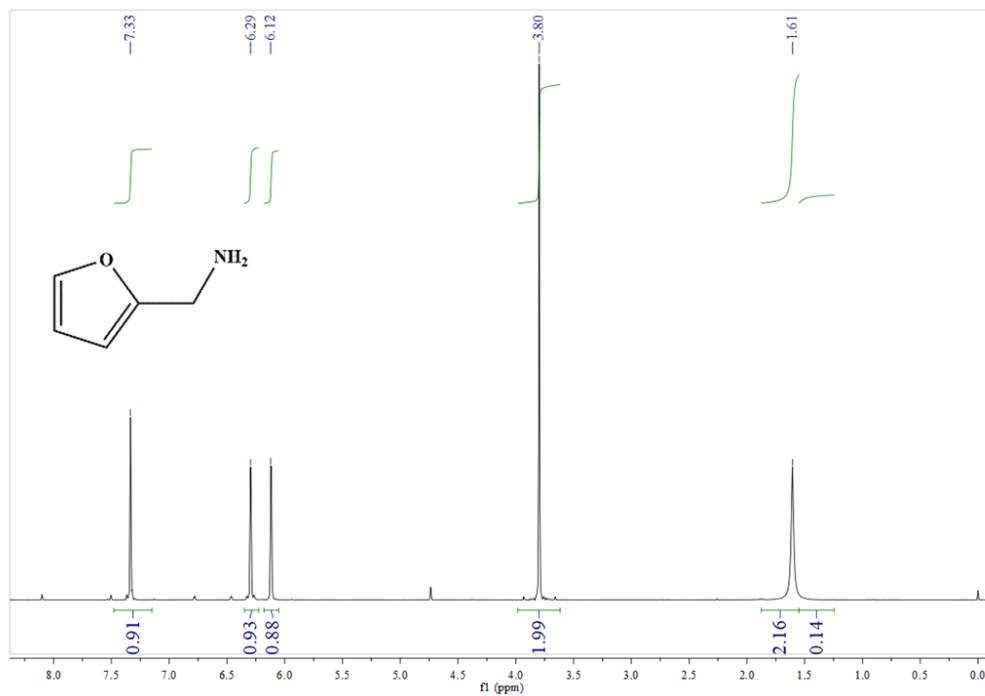

$^1\text{H}$  NMR spectra of furfurylamine

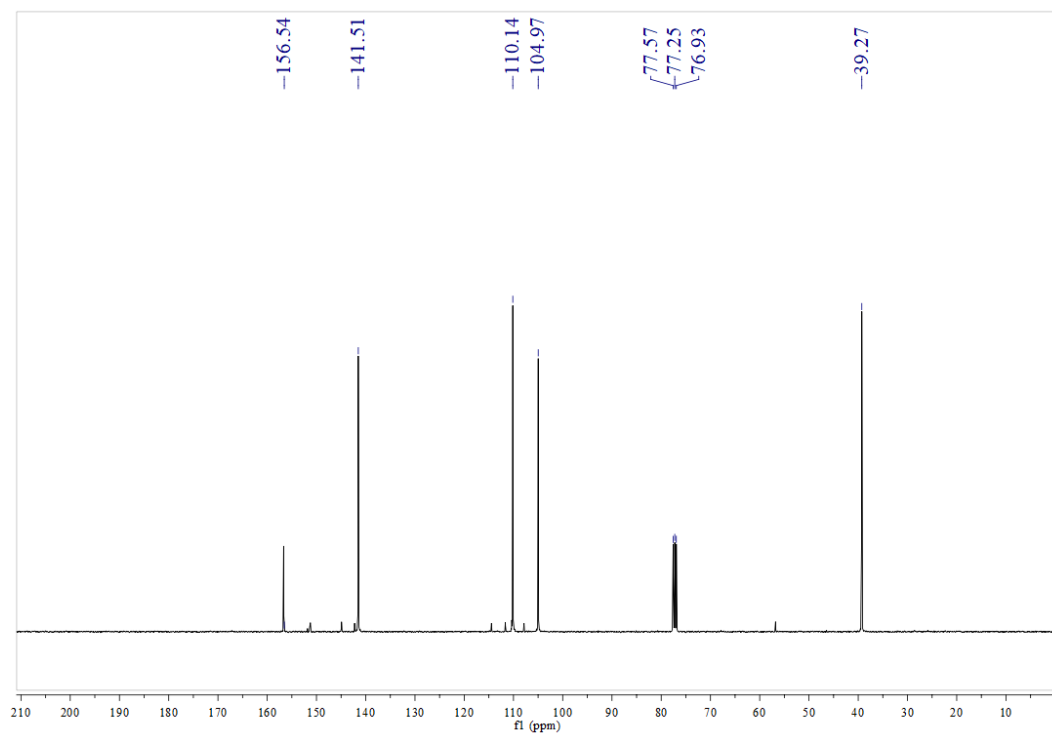

$^{13}\text{C}$  spectra NMR of furfurylamine

File :C:\Users\Administrator\Desktop\gcms-rawfiles\IO-118097007.D  
Operator : NCMS-HP\admin  
Acquired : 17 Aug 2021 14:42 using AcqMethod GENERAL-METHOD.M  
Instrument : GCMS  
Sample Name: NL-FAM  
Misc Info :  
Vial Number: 8

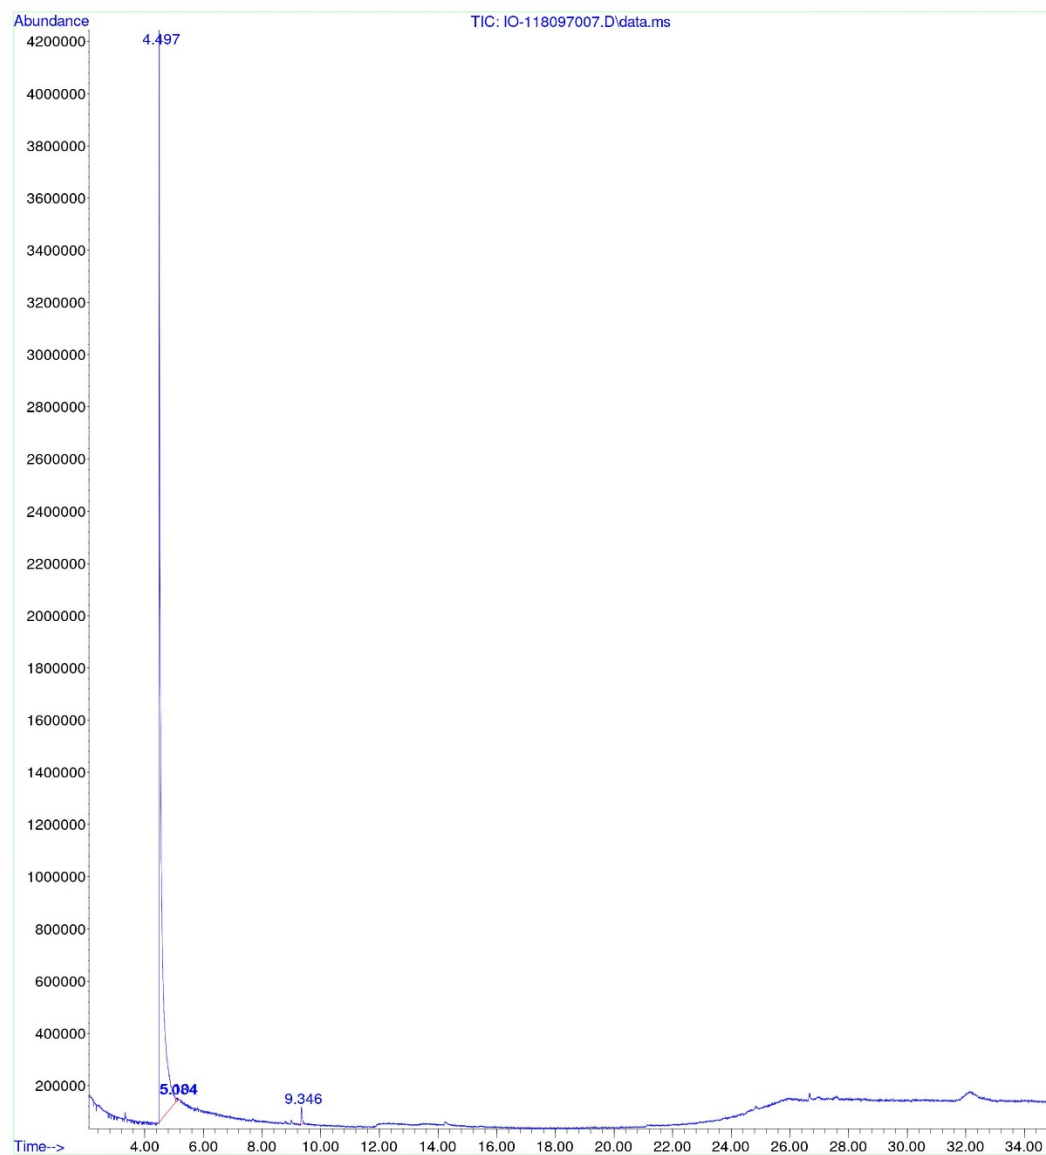

GC spectra of reductive amination of furfural.

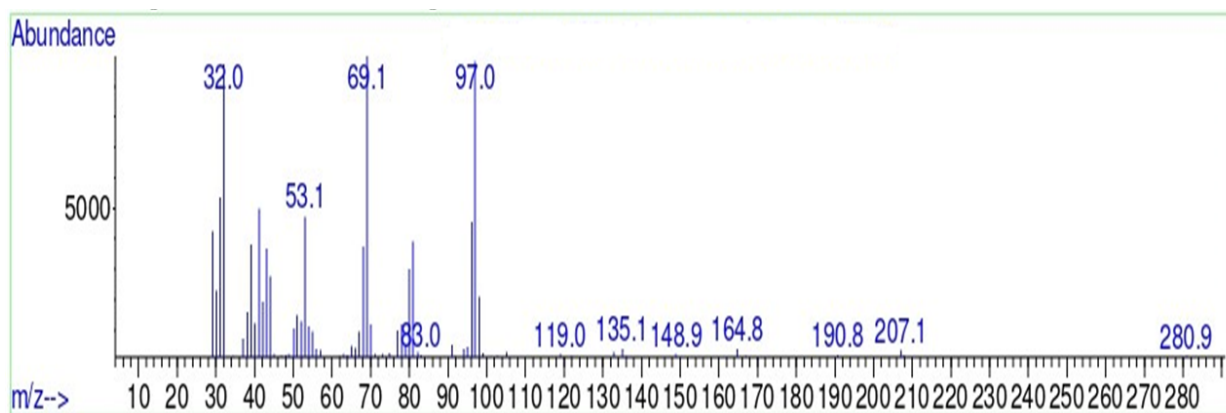

m/z value of furfurylamine

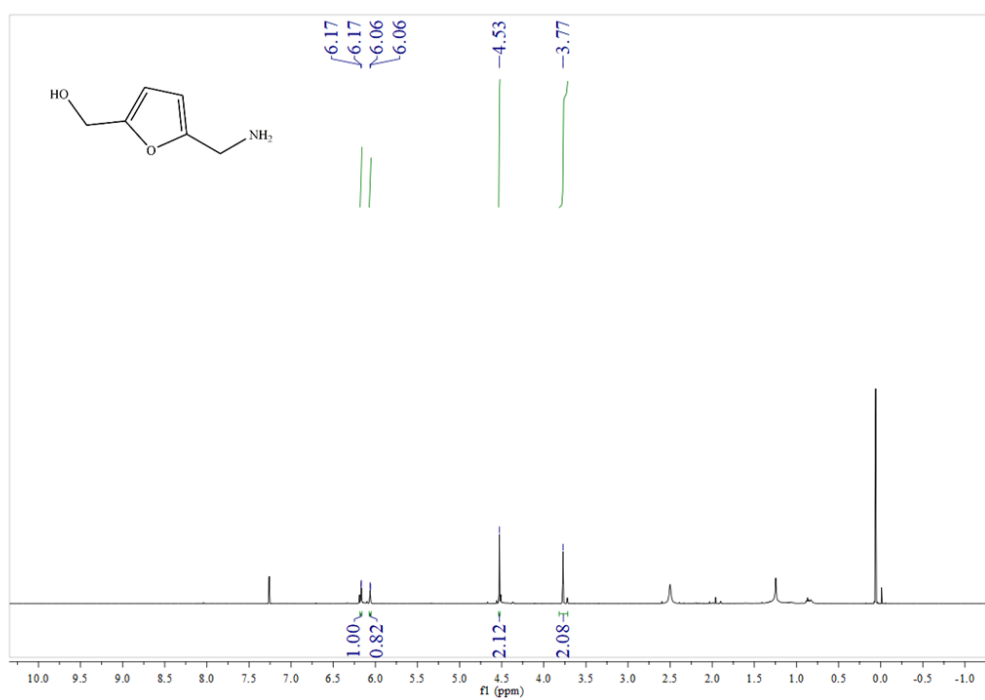

<sup>1</sup>H NMR spectra of (5-(aminomethyl)furan-2-yl)methanol

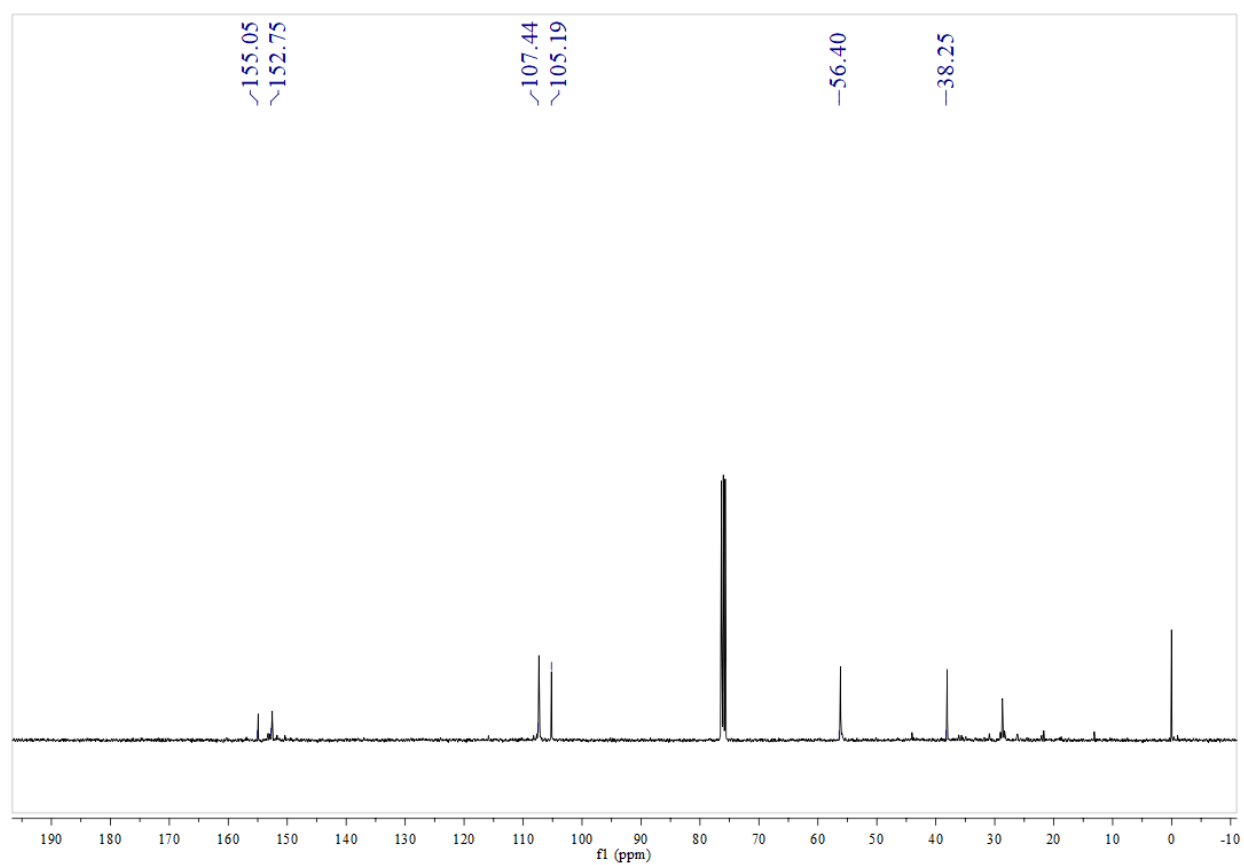

$^{13}\text{C}$  spectra NMR of (5-(aminomethyl)furan-2-yl)methanol

File :C:\Users\Administrator\Desktop\gcms-rawfiles\IO-118097141.D  
Operator : NCMS-HP\admin  
Acquired : 19 Aug 2021 21:15 using AcqMethod GENERAL-METHOD.M  
Instrument : GCMS  
Sample Name: NL-HMF  
Misc Info :  
Vial Number: 11

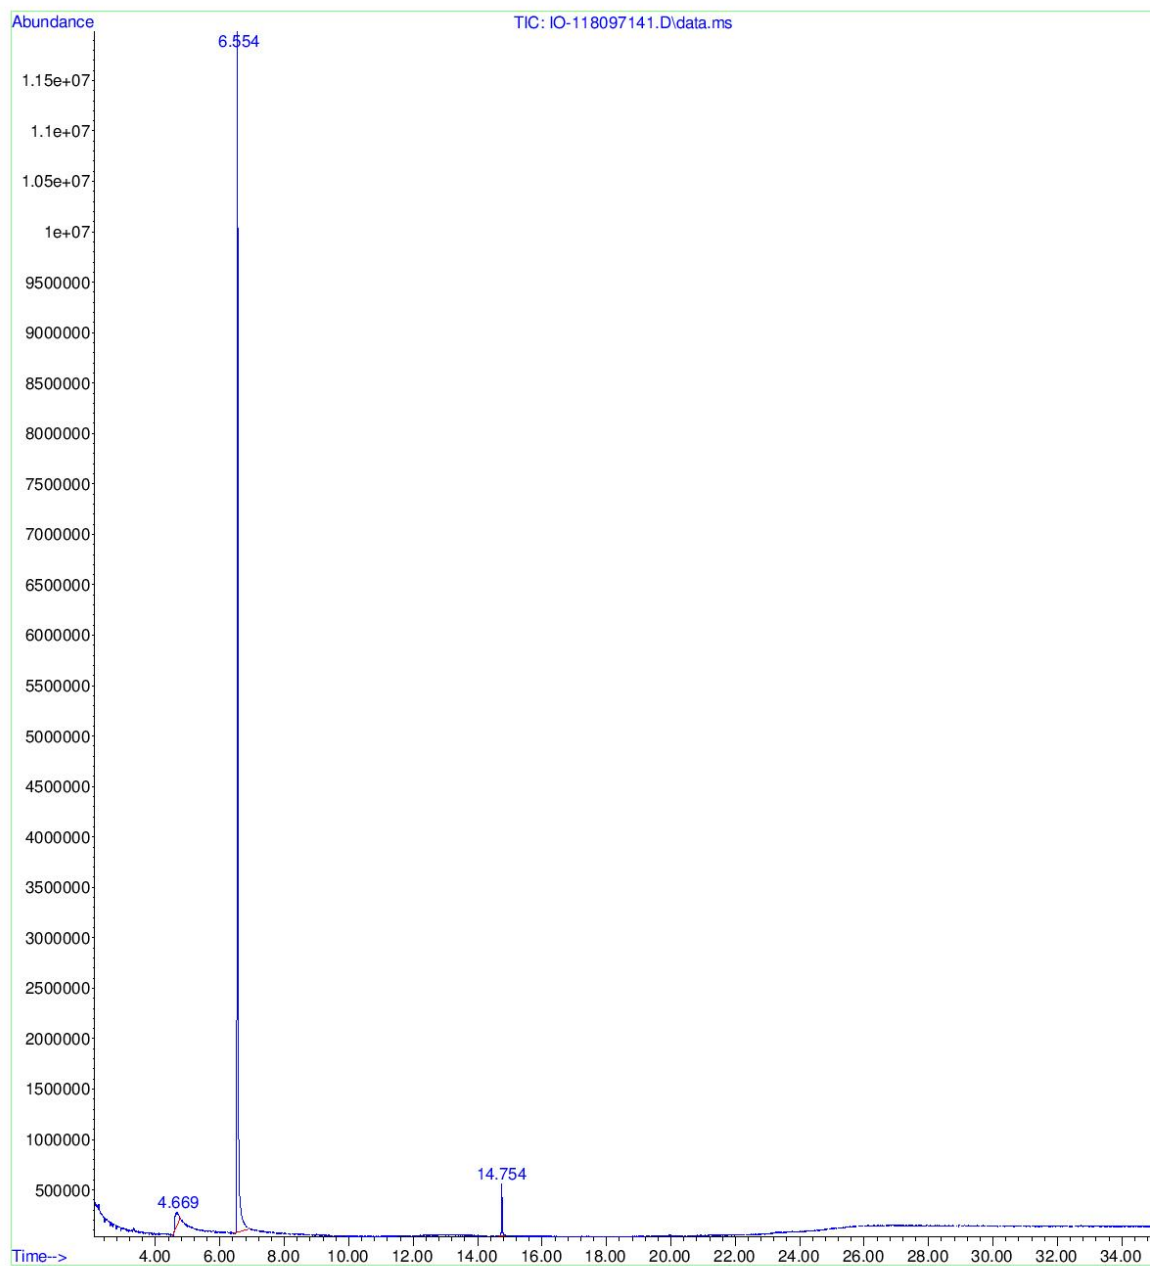

GCMS spectra of 5-HMF reductive amination reaction.

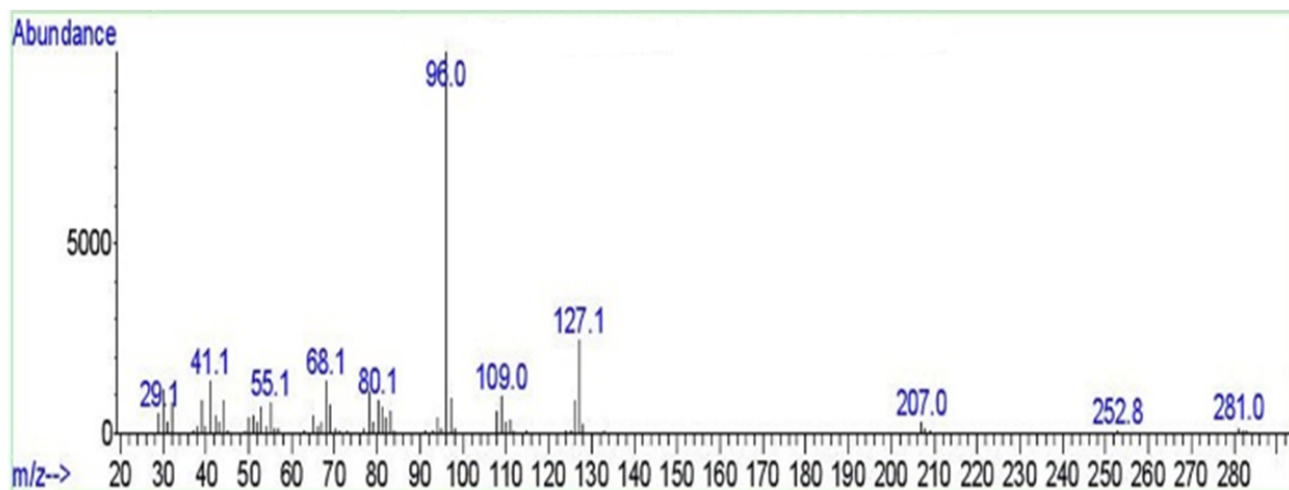

*m/z* values of (5-(aminomethyl)furan-2-yl)methanol

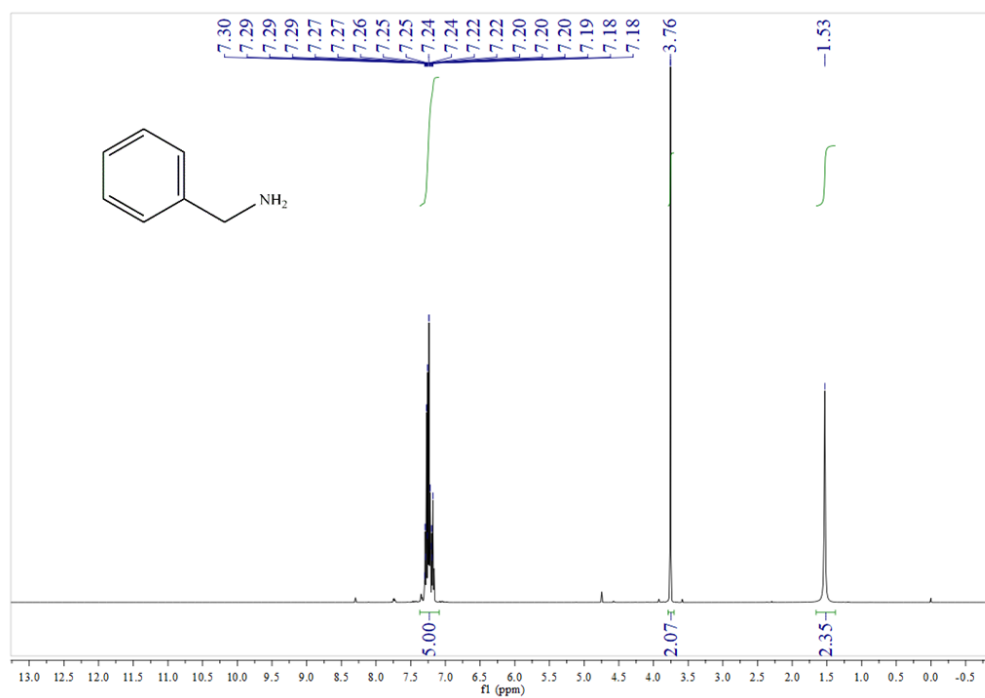

<sup>1</sup>H spectra NMR of phenylmethanamine

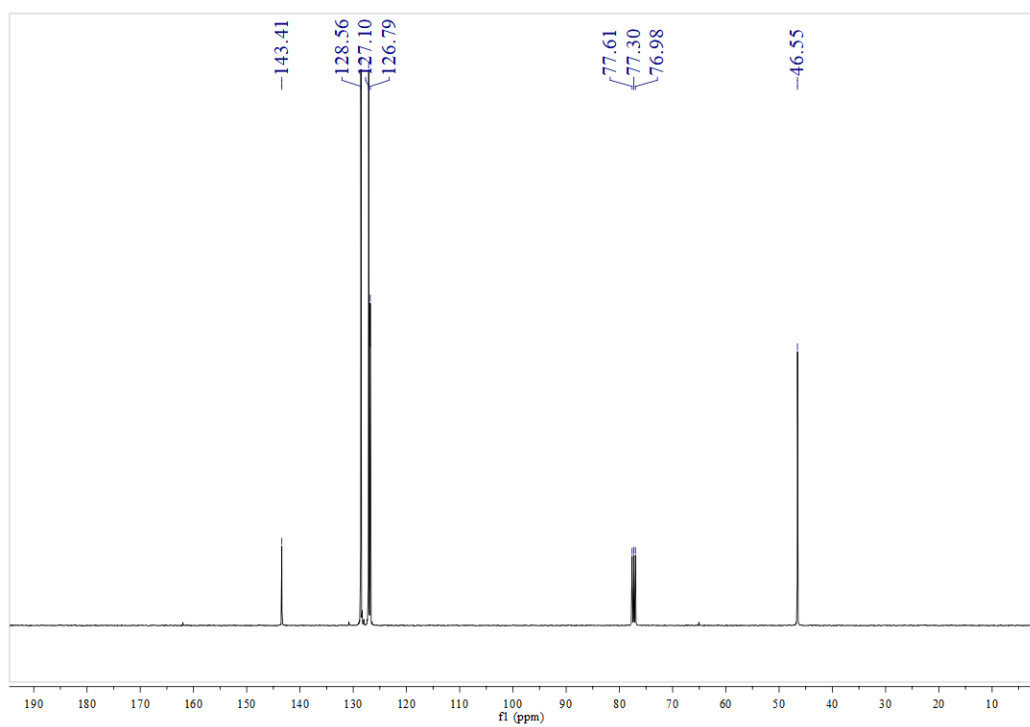

$^{13}\text{C}$  NMR spectra of phenylmethanamine

# Library Search Report

Data Path : D:\raw files\  
Data File : IO-1180132960.D  
Acq On : 23 May 2022 11:39  
Operator :  
Sample : NL-BENZAL  
Misc :  
ALS Vial : 3 Sample Multiplier: 1

Search Libraries: C:\Database\NIST02.L Minimum Quality: 0  
C:\Database\NIST14.L Minimum Quality: 0  
C:\Database\W9N11.L

Unknown Spectrum: Apex  
Integration Events: ChemStation Integrator - autoint1.e

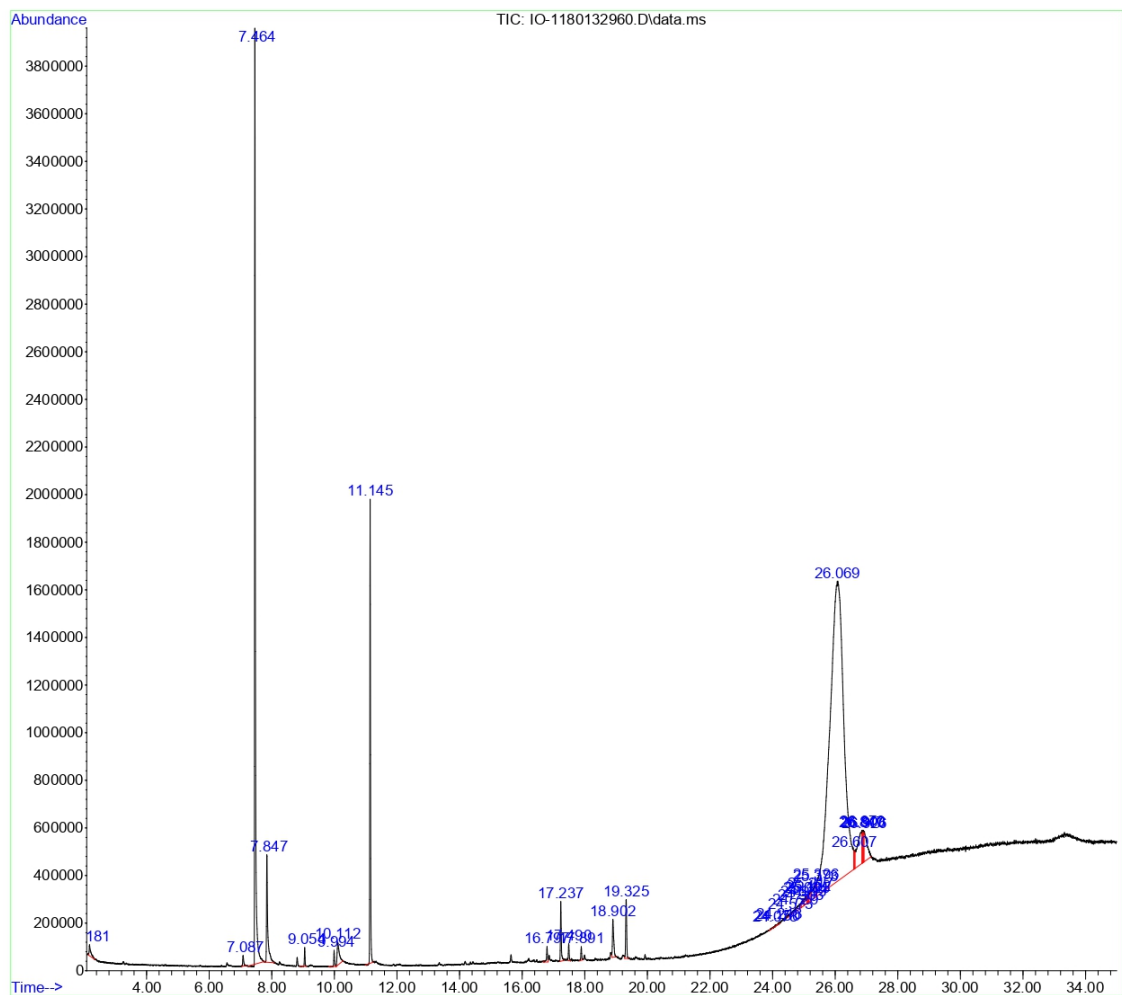

GCMS spectra of reaction mixture of benzaldehyde reductive amination

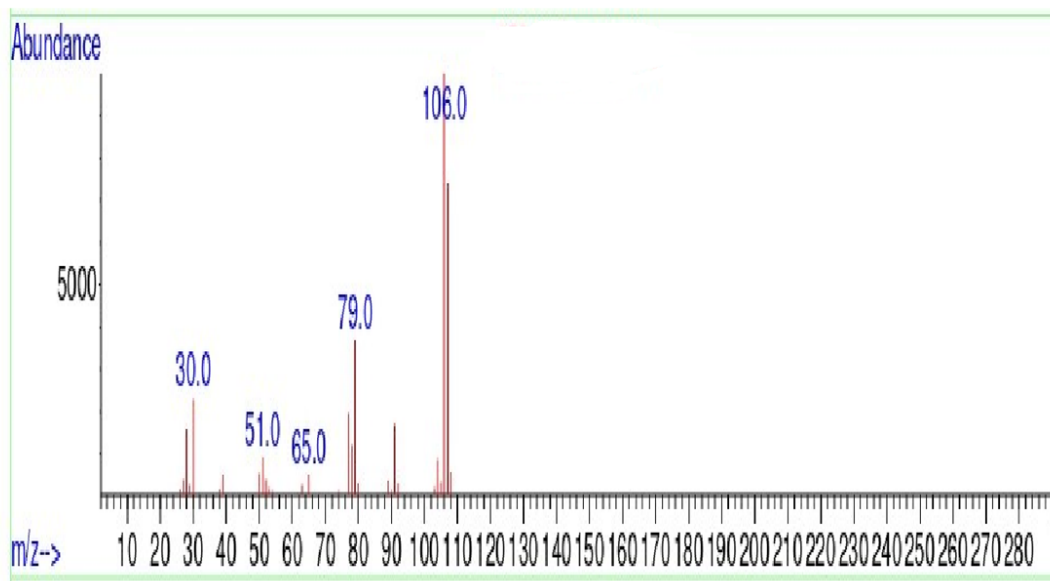

$m/z$  values of phenylmethanamine

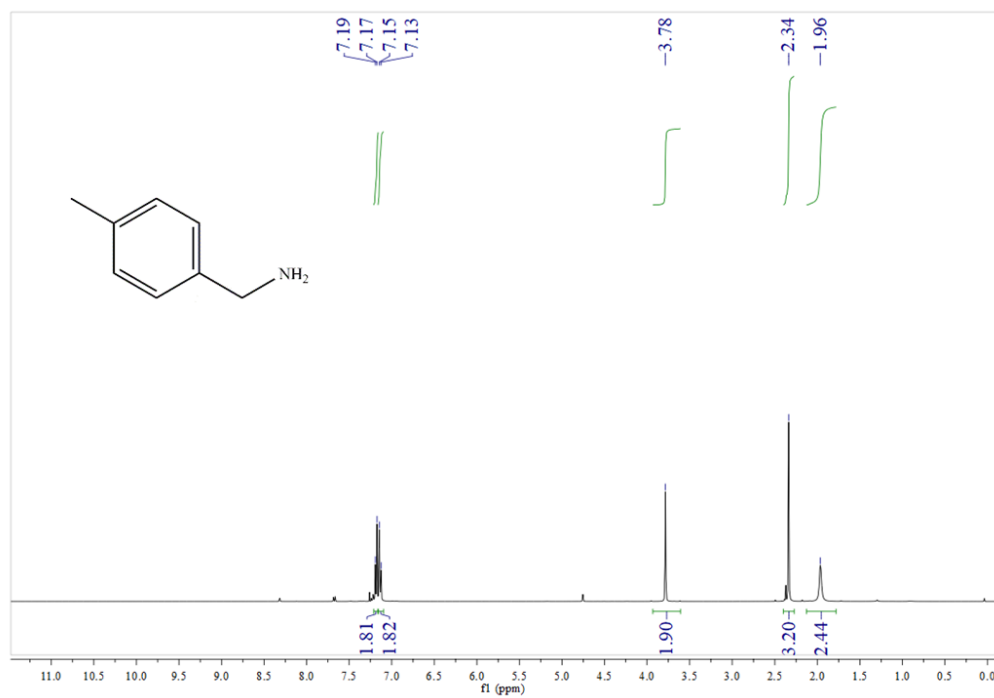

$^1\text{H}$  NMR spectra of (4-methylphenyl)methanamine

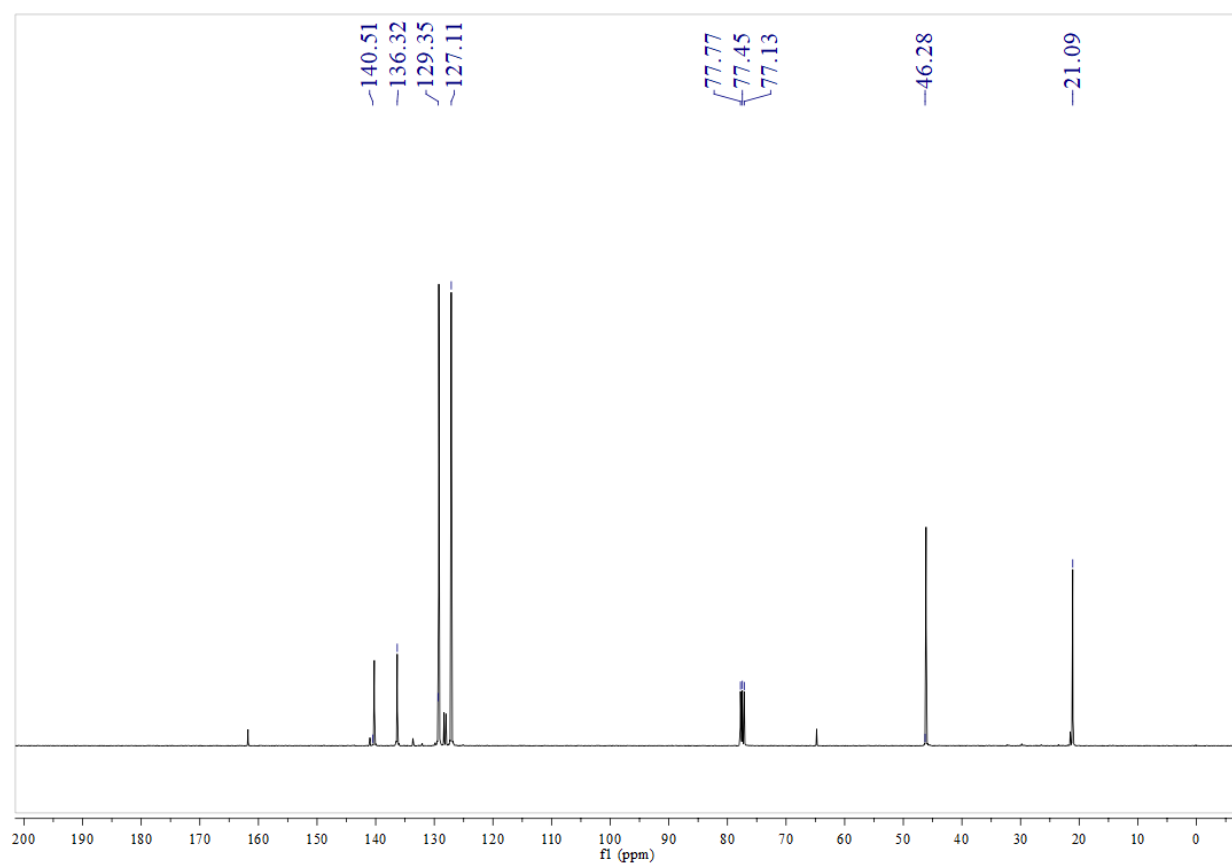

<sup>13</sup>C NMR spectra of (4-methylphenyl)methanamine

File :D:\gcms-rawfiles\IO-118097528.D  
Operator : NCMS-HP\admin  
Acquired : 26 Aug 2021 13:09 using AcqMethod GENERAL-METHOD.M  
Instrument : GCMS  
Sample Name: NL-TOLYLLALDEHYDE  
Misc Info :  
Vial Number: 3

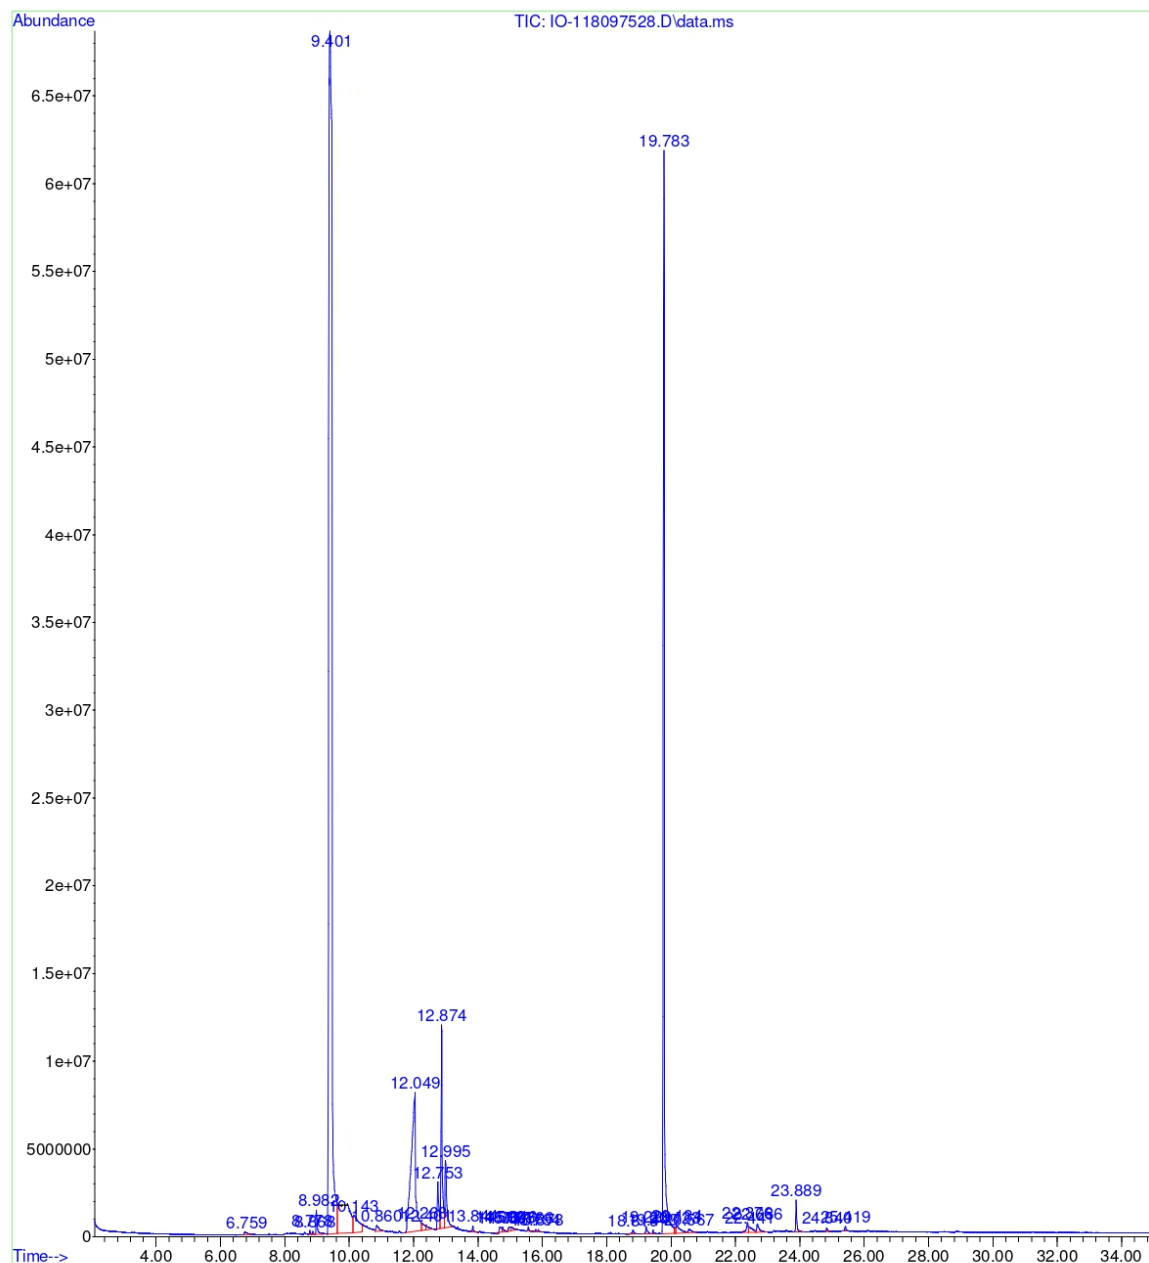

GCMS spectra of reaction mixture of 4-methylbenzaldehyde reductive amination

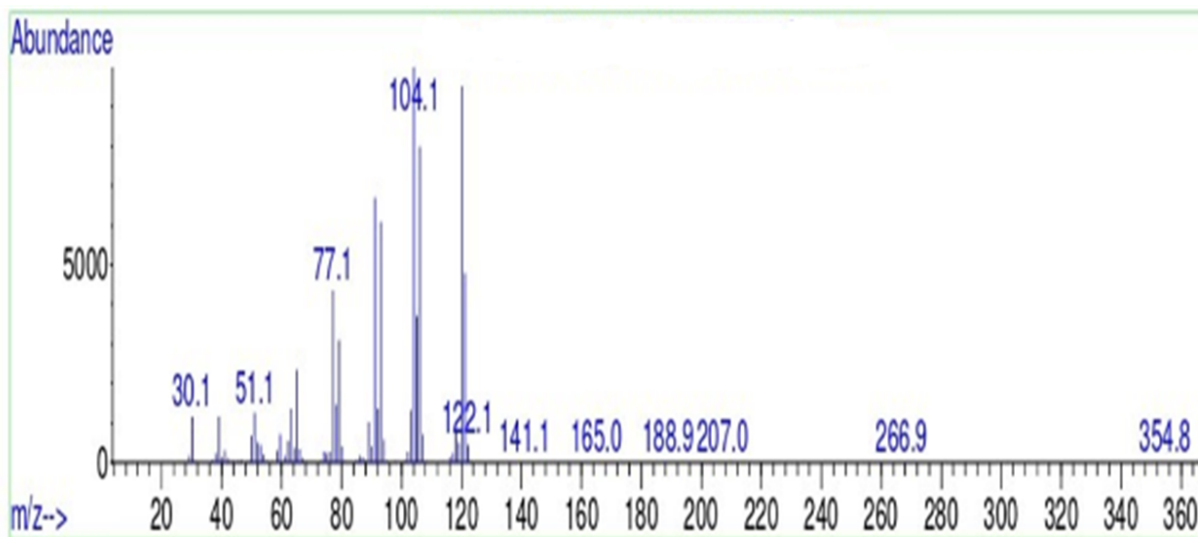

$m/z$  values of (4-methylphenyl)methanamine

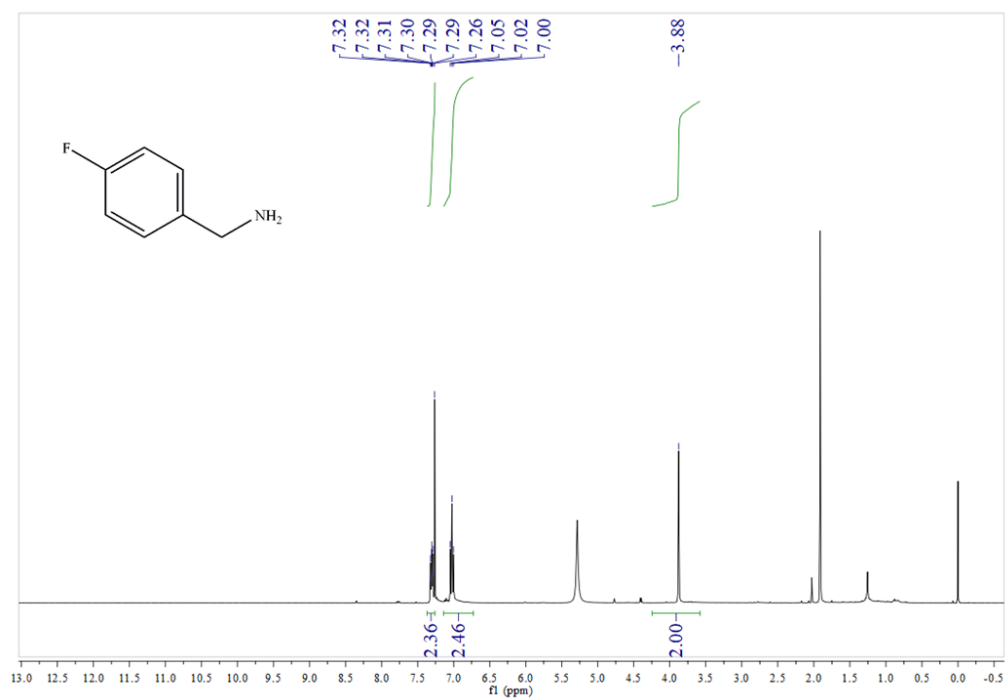

<sup>1</sup>H NMR spectra of (4-fluorophenyl)methanamine

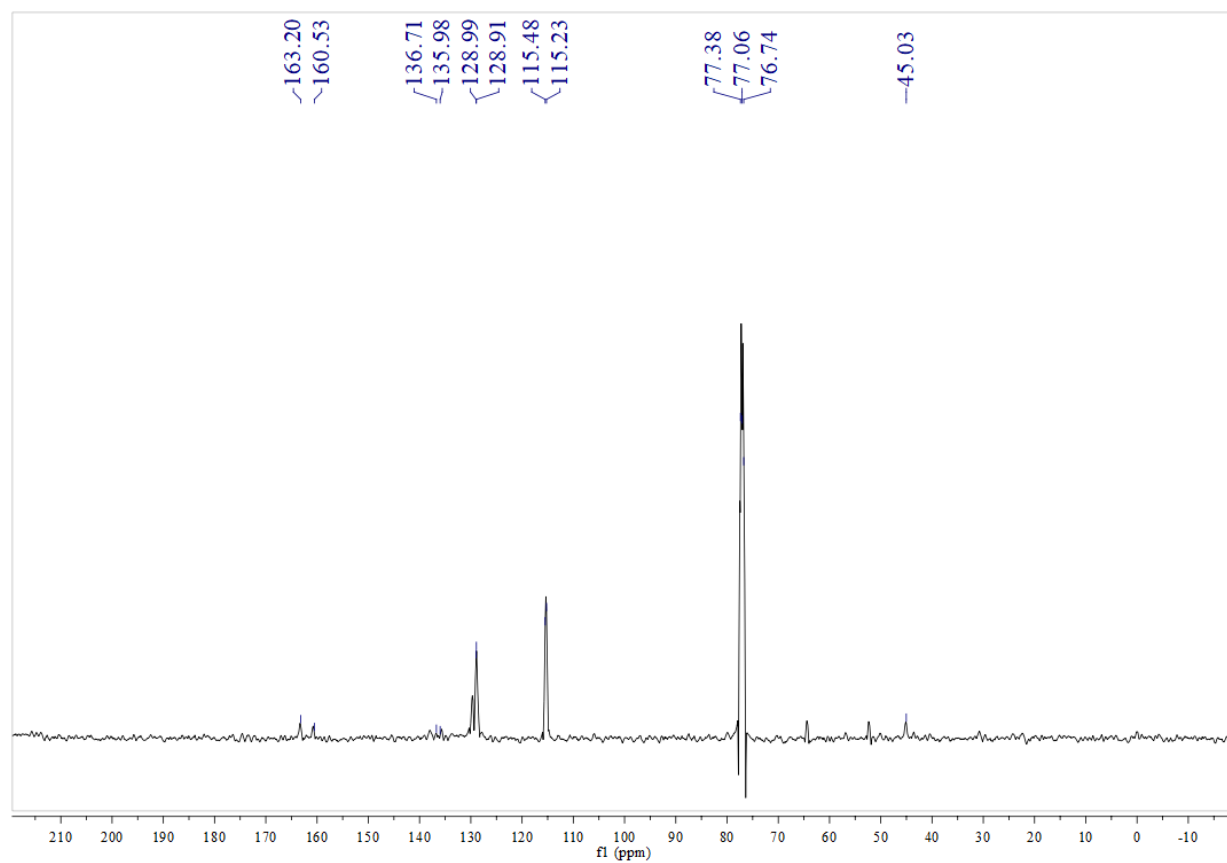

<sup>13</sup>C NMR spectra of (4-fluorophenyl)methanamine

File :D:\gcms-rawfiles\IO-118097721.D  
Operator : NCMS-HP\admin  
Acquired : 31 Aug 2021 15:26 using AcqMethod GENERAL-METHOD.M  
Instrument : GCMS  
Sample Name: NL-FBZ  
Misc Info :  
Vial Number: 1

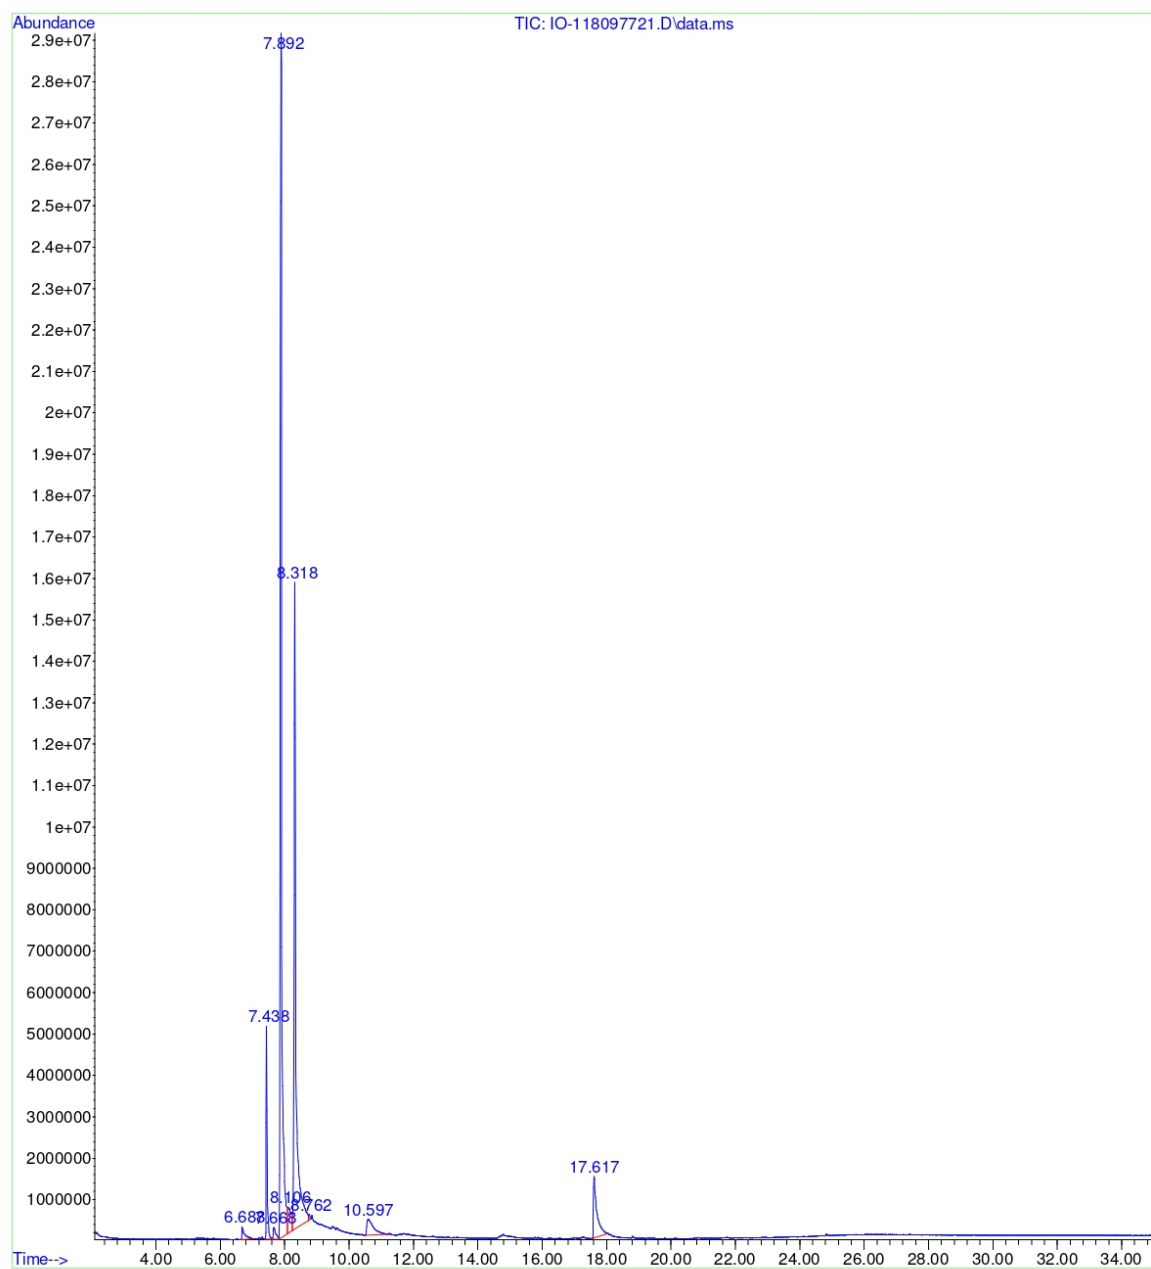

GCMS spectra of reaction mixture of 4-fluorobenzaldehyde reductive amination

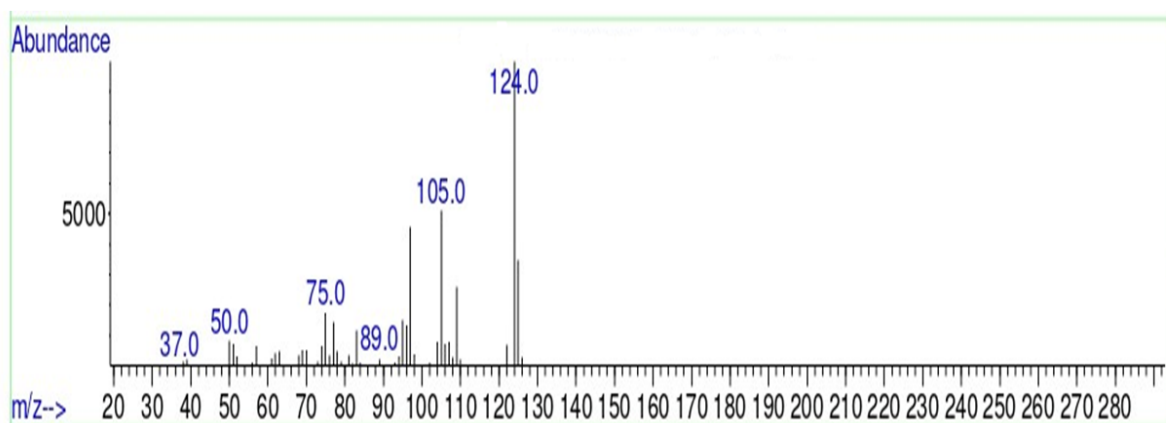

$m/z$  values of (4-fluorophenyl)methanamine

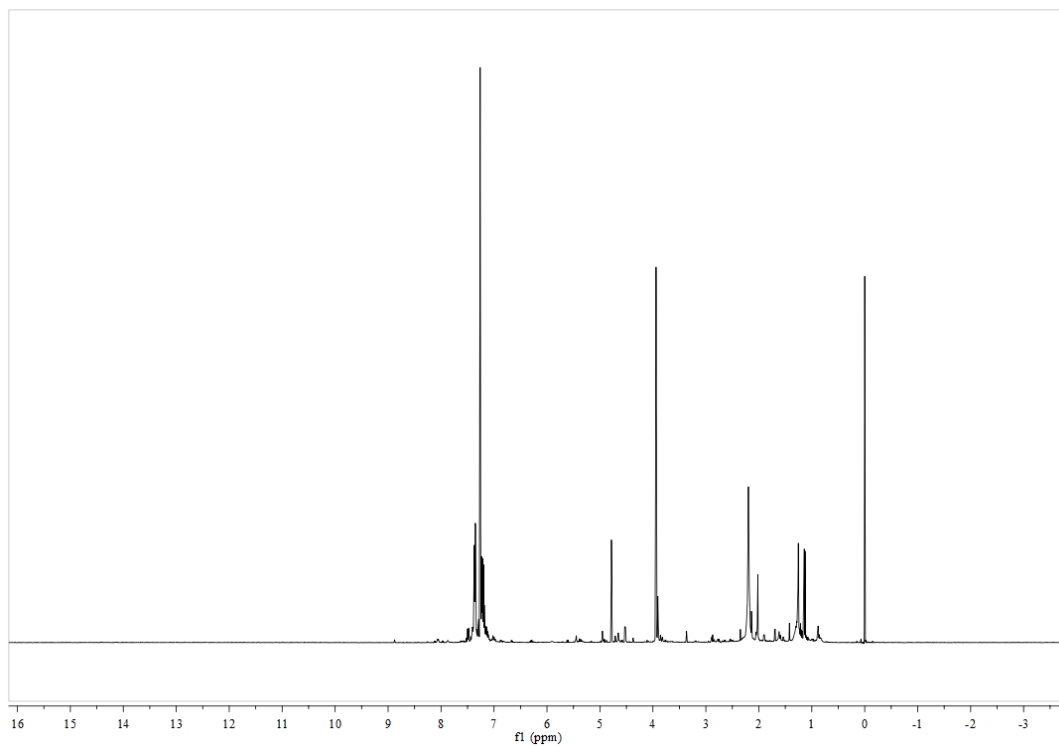

$^1\text{H}$  NMR spectra of crude (2-chlorophenyl)methanamine.

C:\GCMSolution\Data\Project1\DEC\_19\YGT32CHBZ24052022.qgd

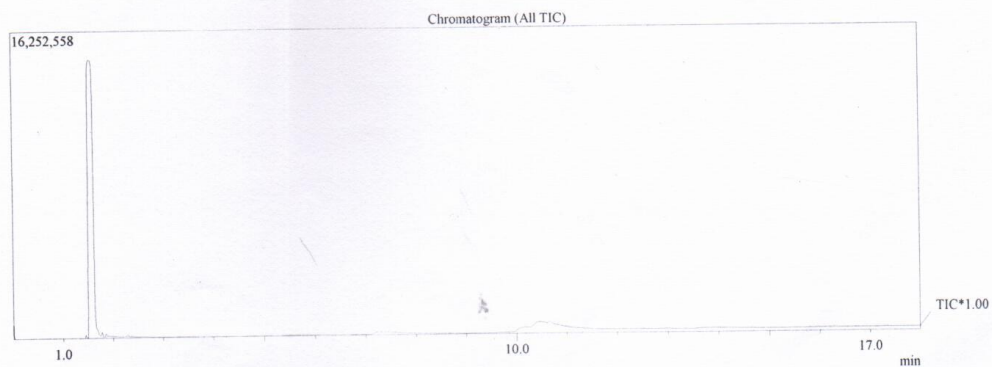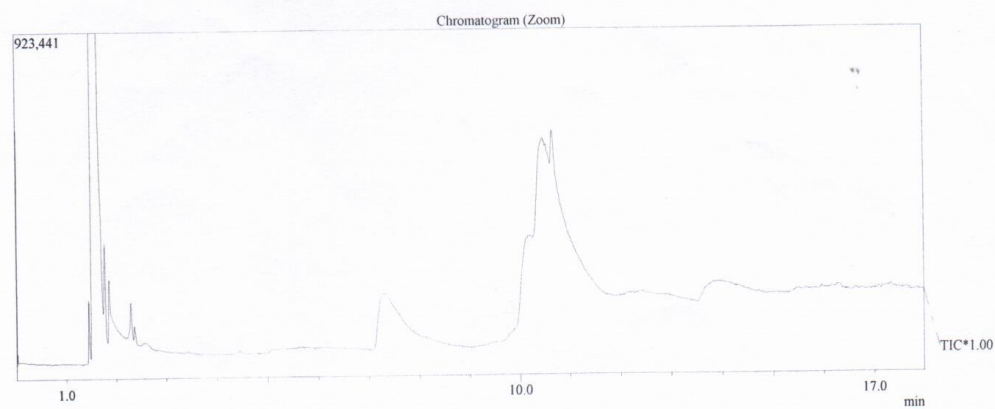

Spectrum

Line#:1 R.Time:10.500(Scan#:2101)  
MassPeaks:325  
RawMode:Single 10.500(2101) BasePeak:77 10(79167)  
BG Mode:None Group 1 - Event 1 Scan

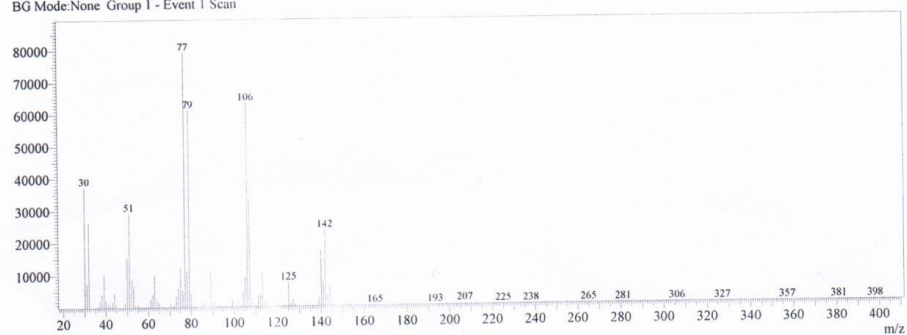

GCMS spectra of reaction mixture of 2-chlorobenzaldehyde reductive amination

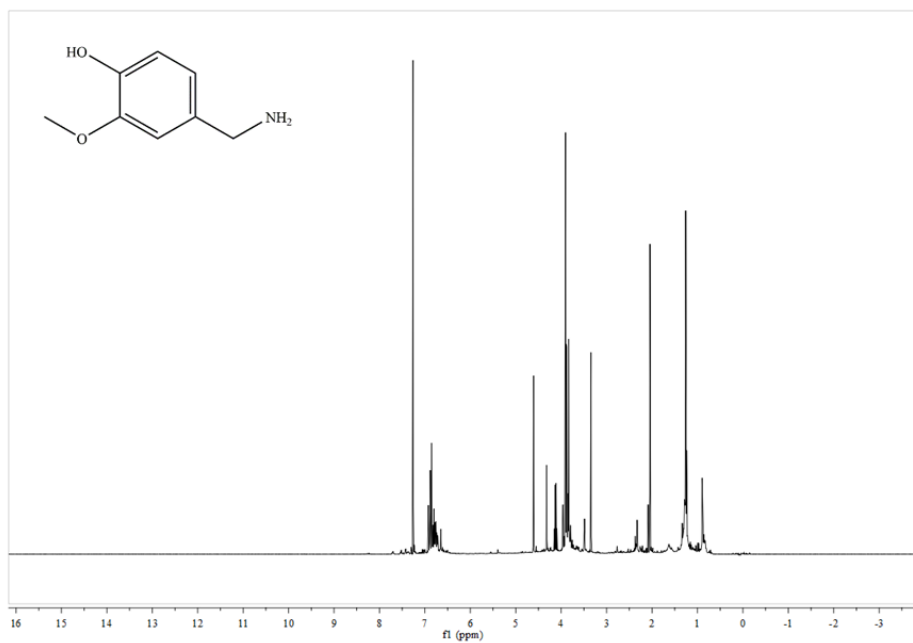

$^1\text{H}$  NMR spectra of crude 4-(aminomethyl)-2-methoxyphenol

File :D:\gcms-rawfiles\IO-118097527.D  
Operator : NCMS-HP\admin  
Acquired : 27 Aug 2021 13:36 using AcqMethod GENERAL-METHOD.M  
Instrument : GCMS  
Sample Name: NL-VANILLIN  
Misc Info :  
Vial Number: 5

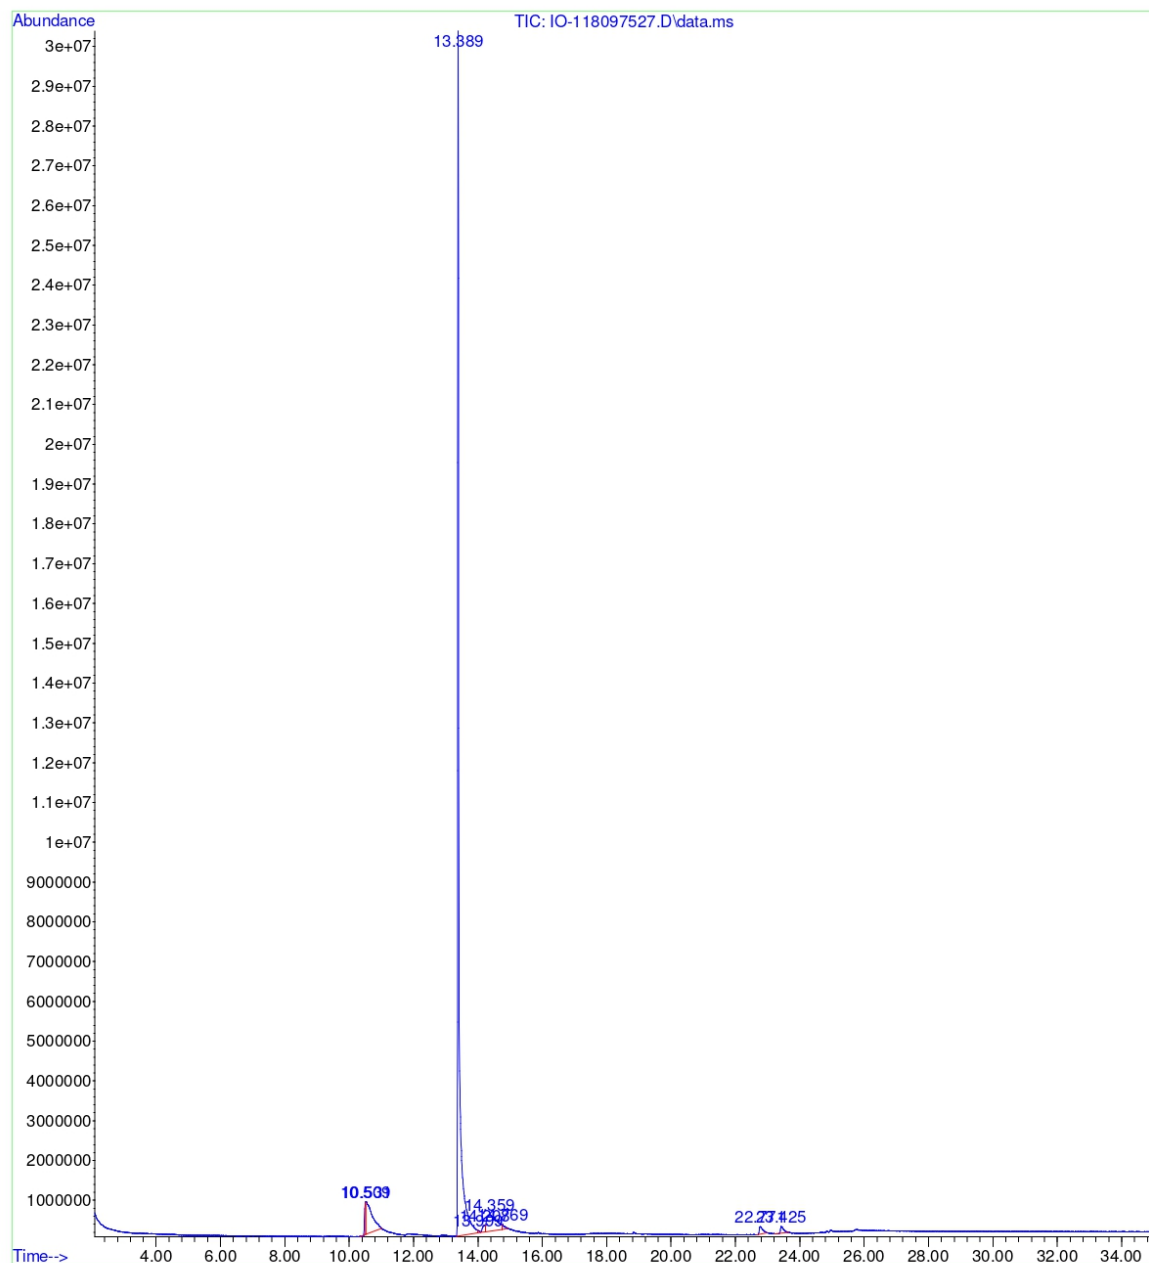

GCMS spectra of reaction mixture of 4-Hydroxy-3-methoxybenzaldehyde reductive amination

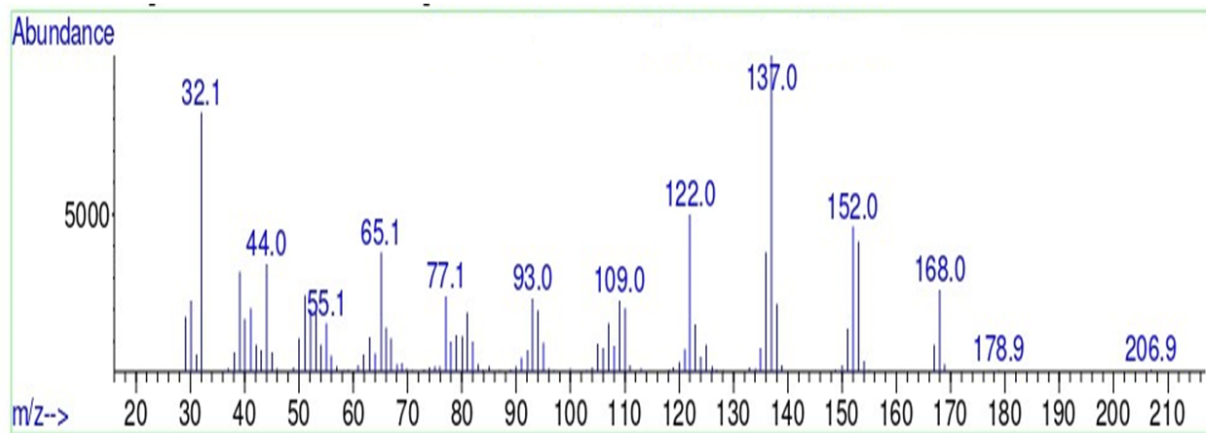

*m/z* values of 4-(aminomethyl)-2-methoxyphenol

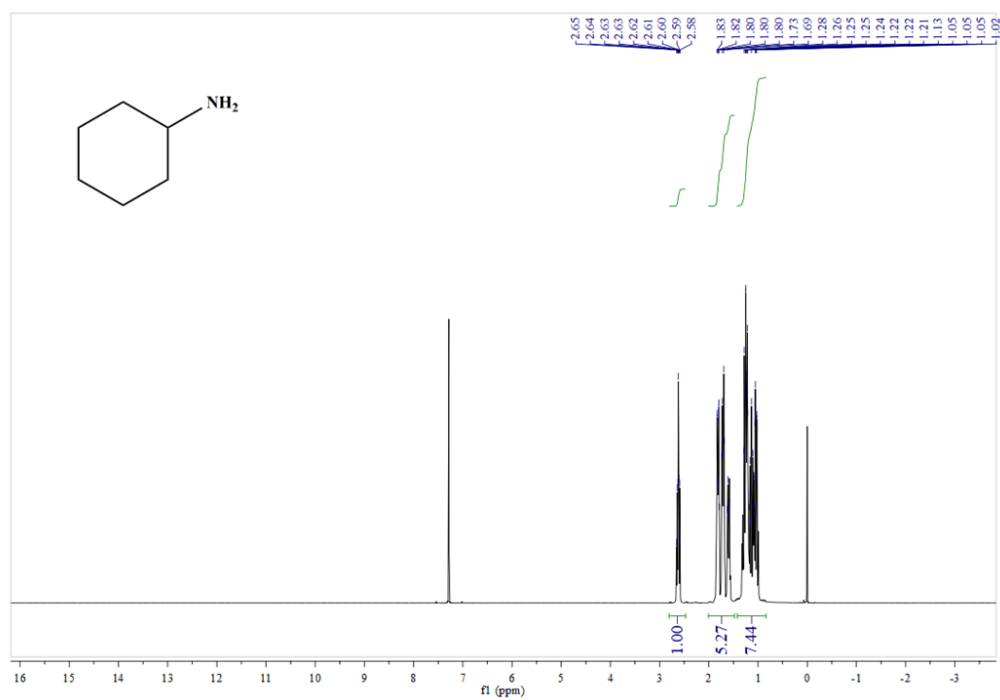

<sup>1</sup>H NMR spectra of cyclohexylamine

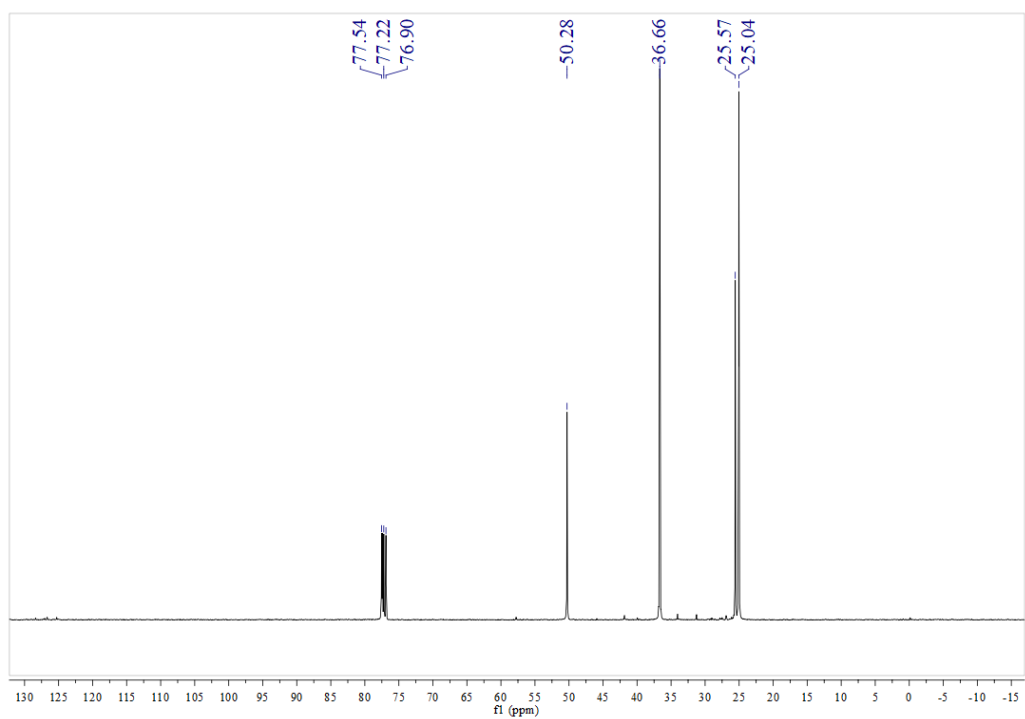

$^{13}\text{C}$  NMR spectra of cyclohexylamine

# Library Search Report

Data Path : D:\raw files\  
Data File : IO-1180132965.D  
Acq On : 23 May 2022 10:56  
Operator :  
Sample : CYCLOHEXANONE  
Misc :  
ALS Vial : 2 Sample Multiplier: 1

Search Libraries: C:\Database\NIST02.L Minimum Quality: 0  
C:\Database\NIST14.L Minimum Quality: 0  
C:\Database\W9N11.L

Unknown Spectrum: Apex  
Integration Events: ChemStation Integrator - autoint1.e

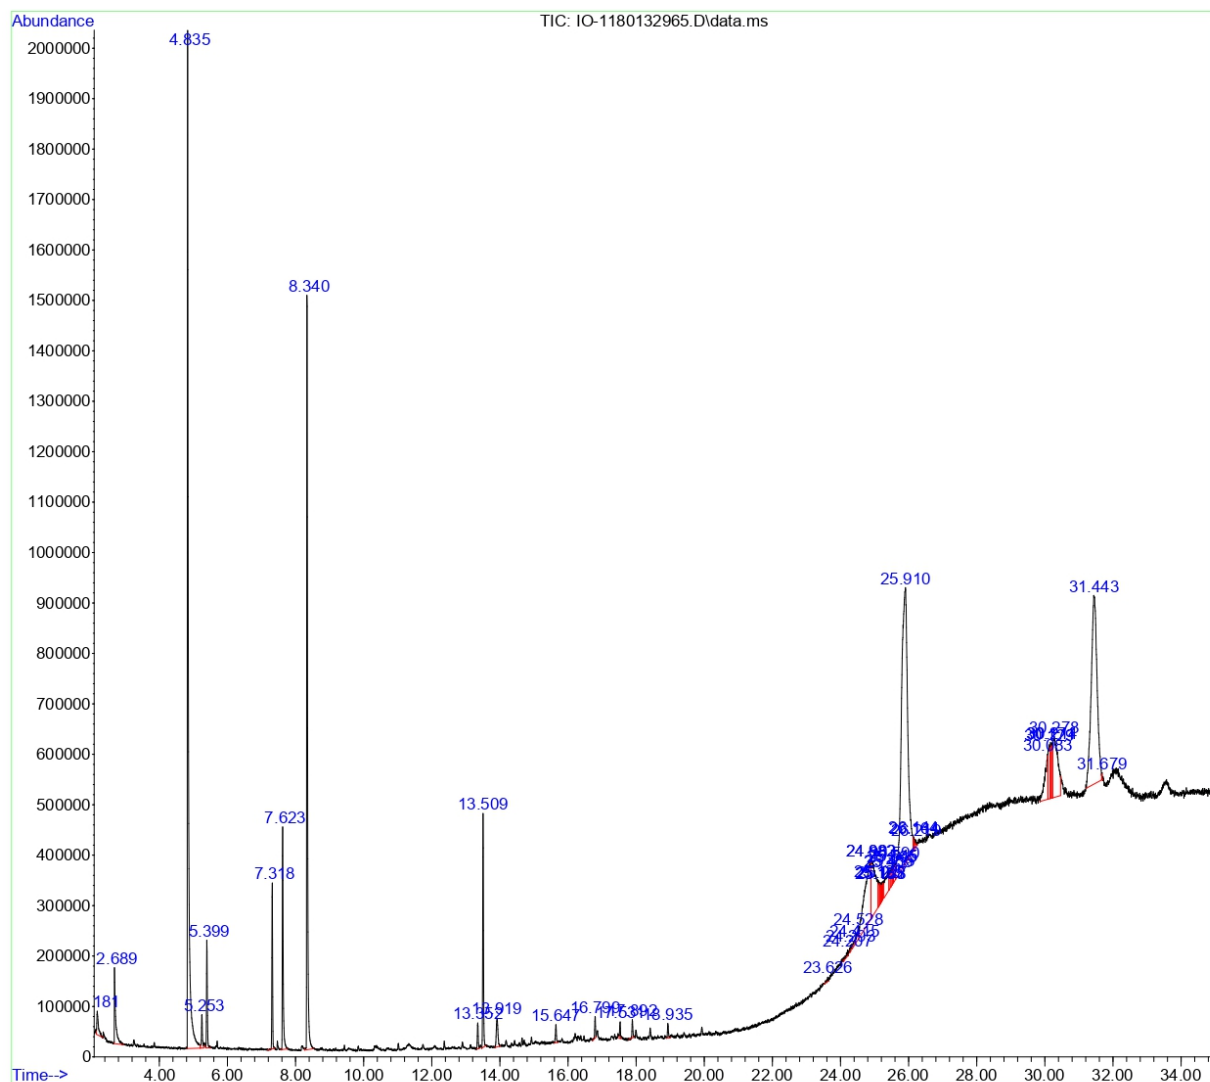

GCMS spectra of reaction mixture of cyclohexanone reductive amination

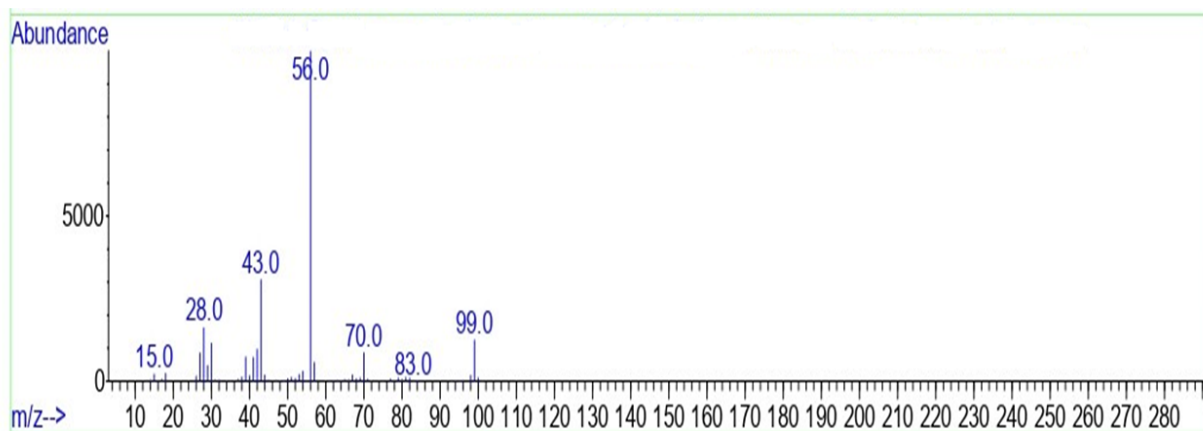

$m/z$  values of cyclohexylamine

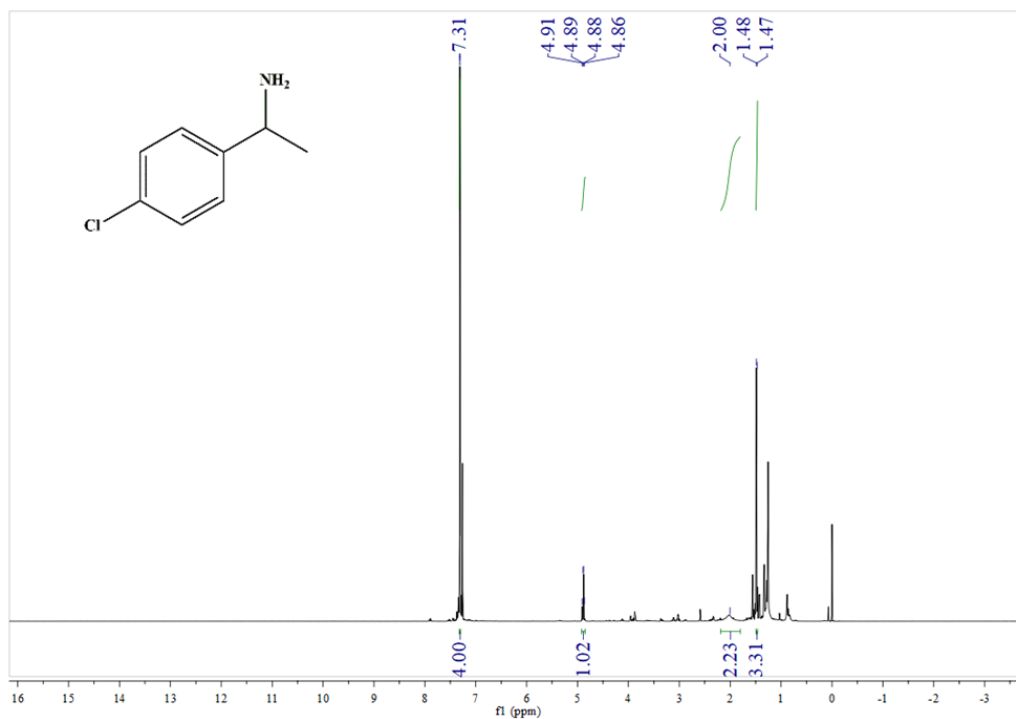

<sup>1</sup>H NMR spectra of (4-chlorophenyl)ethan-1-amine

# Library Search Report

Data Path : D:\raw files\  
Data File : IO-1180132963.D  
Acq On : 23 May 2022 12:22  
Operator :  
Sample : CL-ACPH  
Misc :  
ALS Vial : 4 Sample Multiplier: 1

Search Libraries: C:\Database\NIST02.L Minimum Quality: 0  
C:\Database\NIST14.L Minimum Quality: 0  
C:\Database\W9N11.L

Unknown Spectrum: Apex  
Integration Events: ChemStation Integrator - autoint1.e

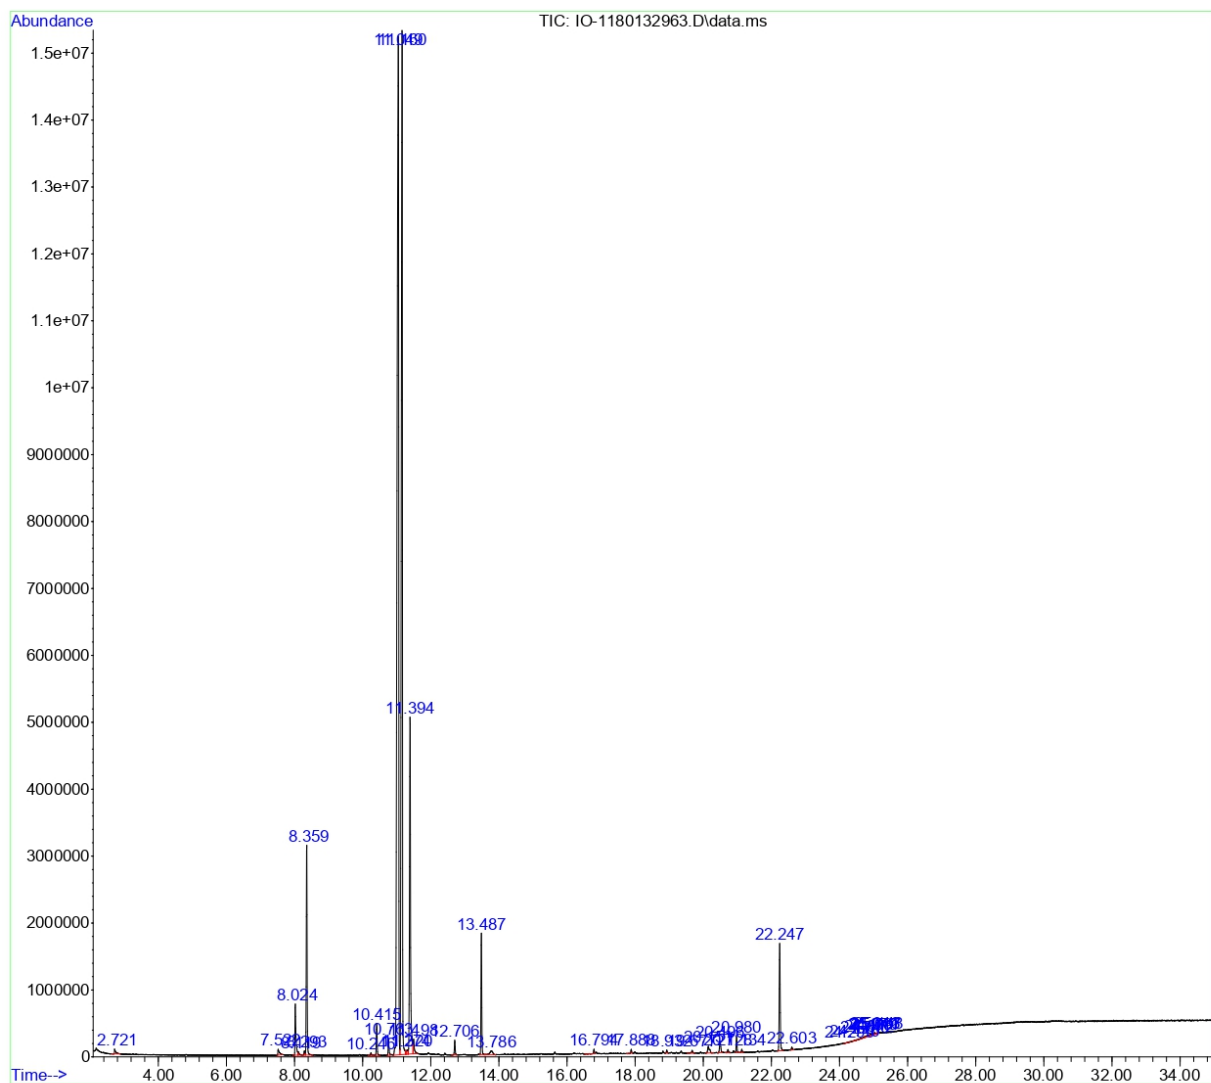

GCMS spectra of reaction mixture of 4-chloroacetophenone reductive amination

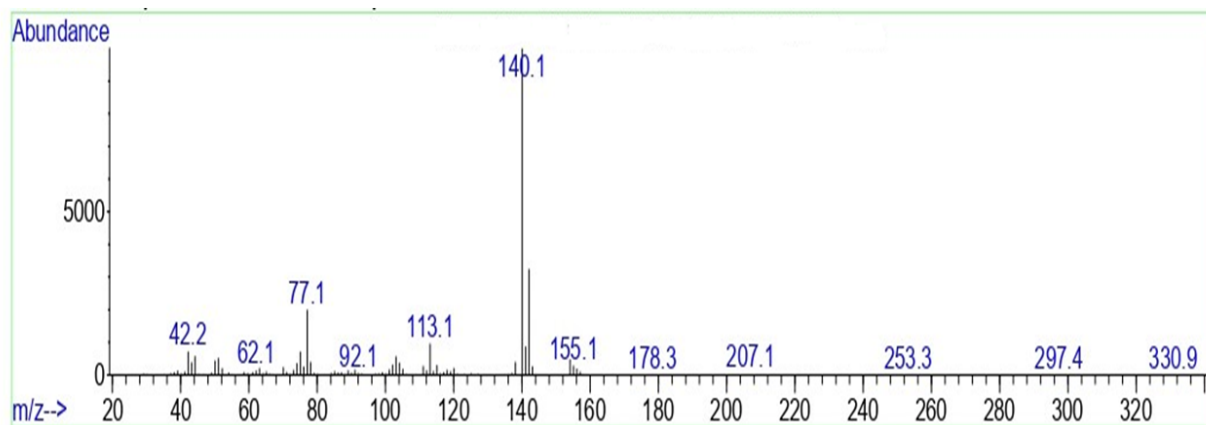

$m/z$  values of (4-chlorophenyl)ethan-1-amine
